# Supplementary material
Source: publisher figshare collection journal article supplement (https://tandf.figshare.com/ndownloader/files/13078943)
Supplement: Supplementary file 1 [file 13078943]

**Supporting Information**

A rhodamine hydrazide–*4-nitroindole-3-carboxaldehyde* based turn on Hg2+ chemosensor: Cytoplasmic live cell imaging, logic gate and memory device applications and computational studies

RAHUL BHOWMICK, ABU SALEH MUSHA ISLAM, MIHIR SASMAL, ATUL KATARKAR and MAHAMMAD ALI*


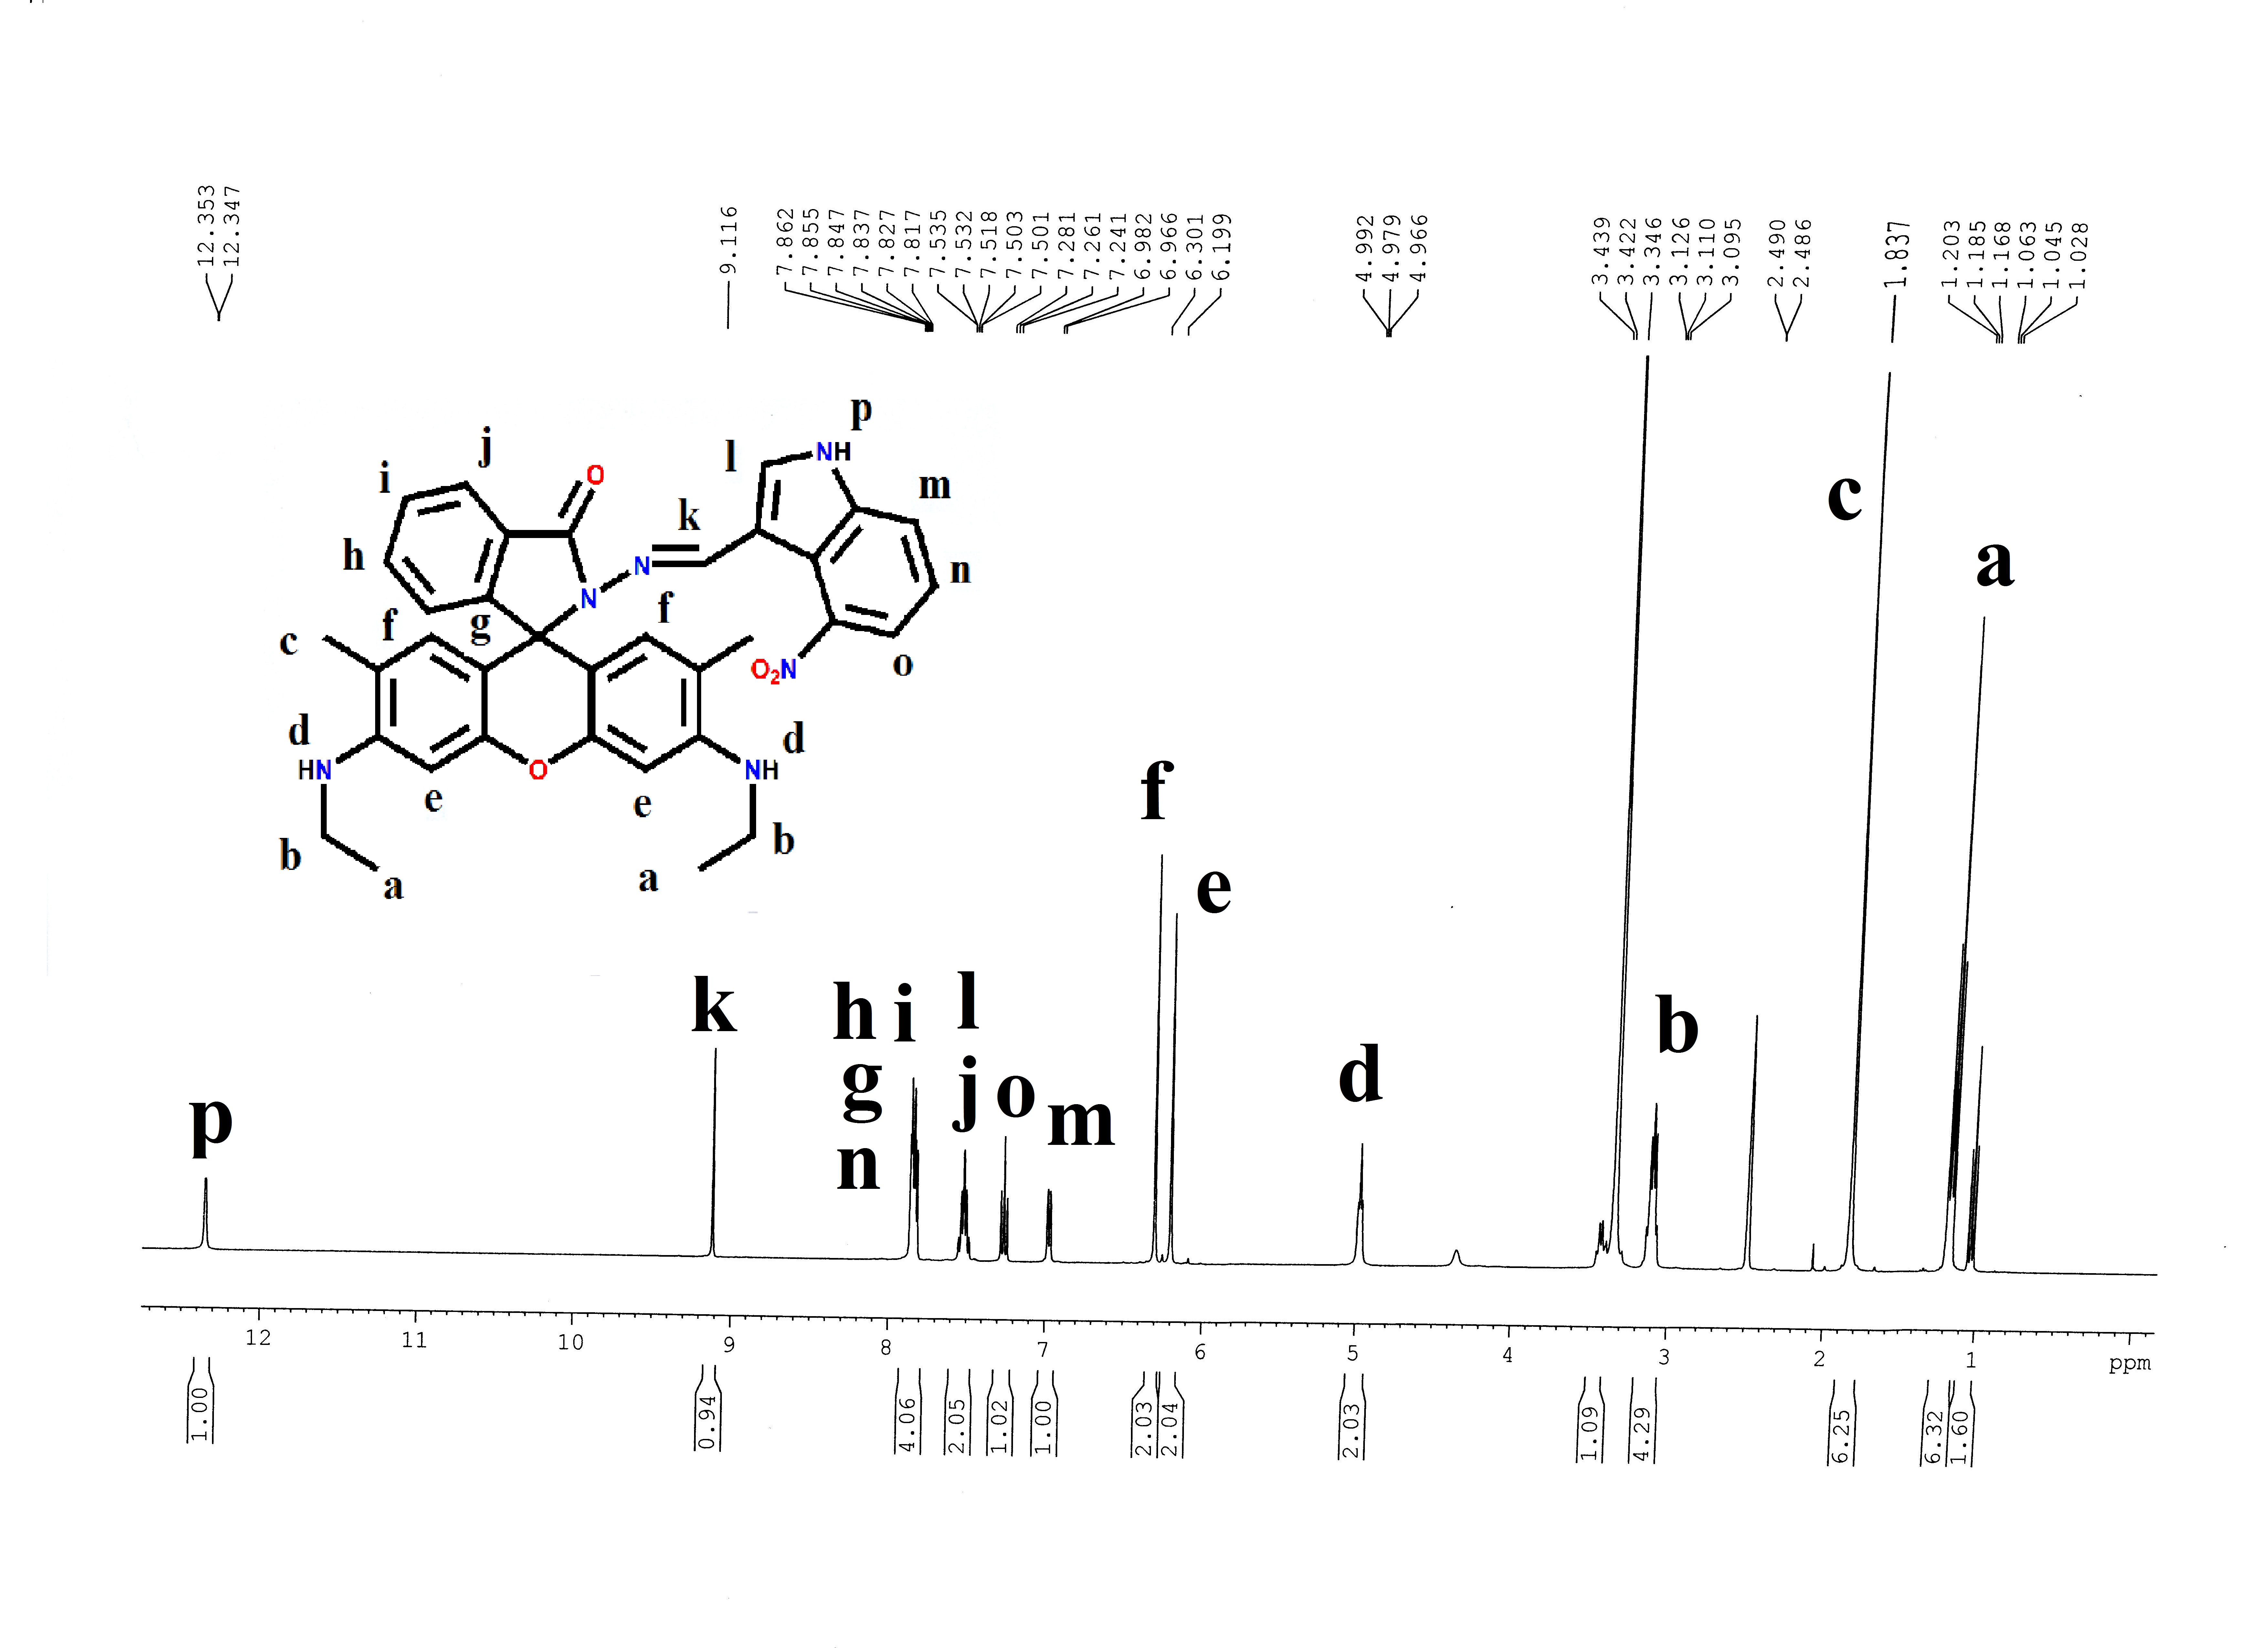


Figure S1. 1H NMR spectra of **L2** in DMSO-*d*6, in Bruker 400 MHz instrument.


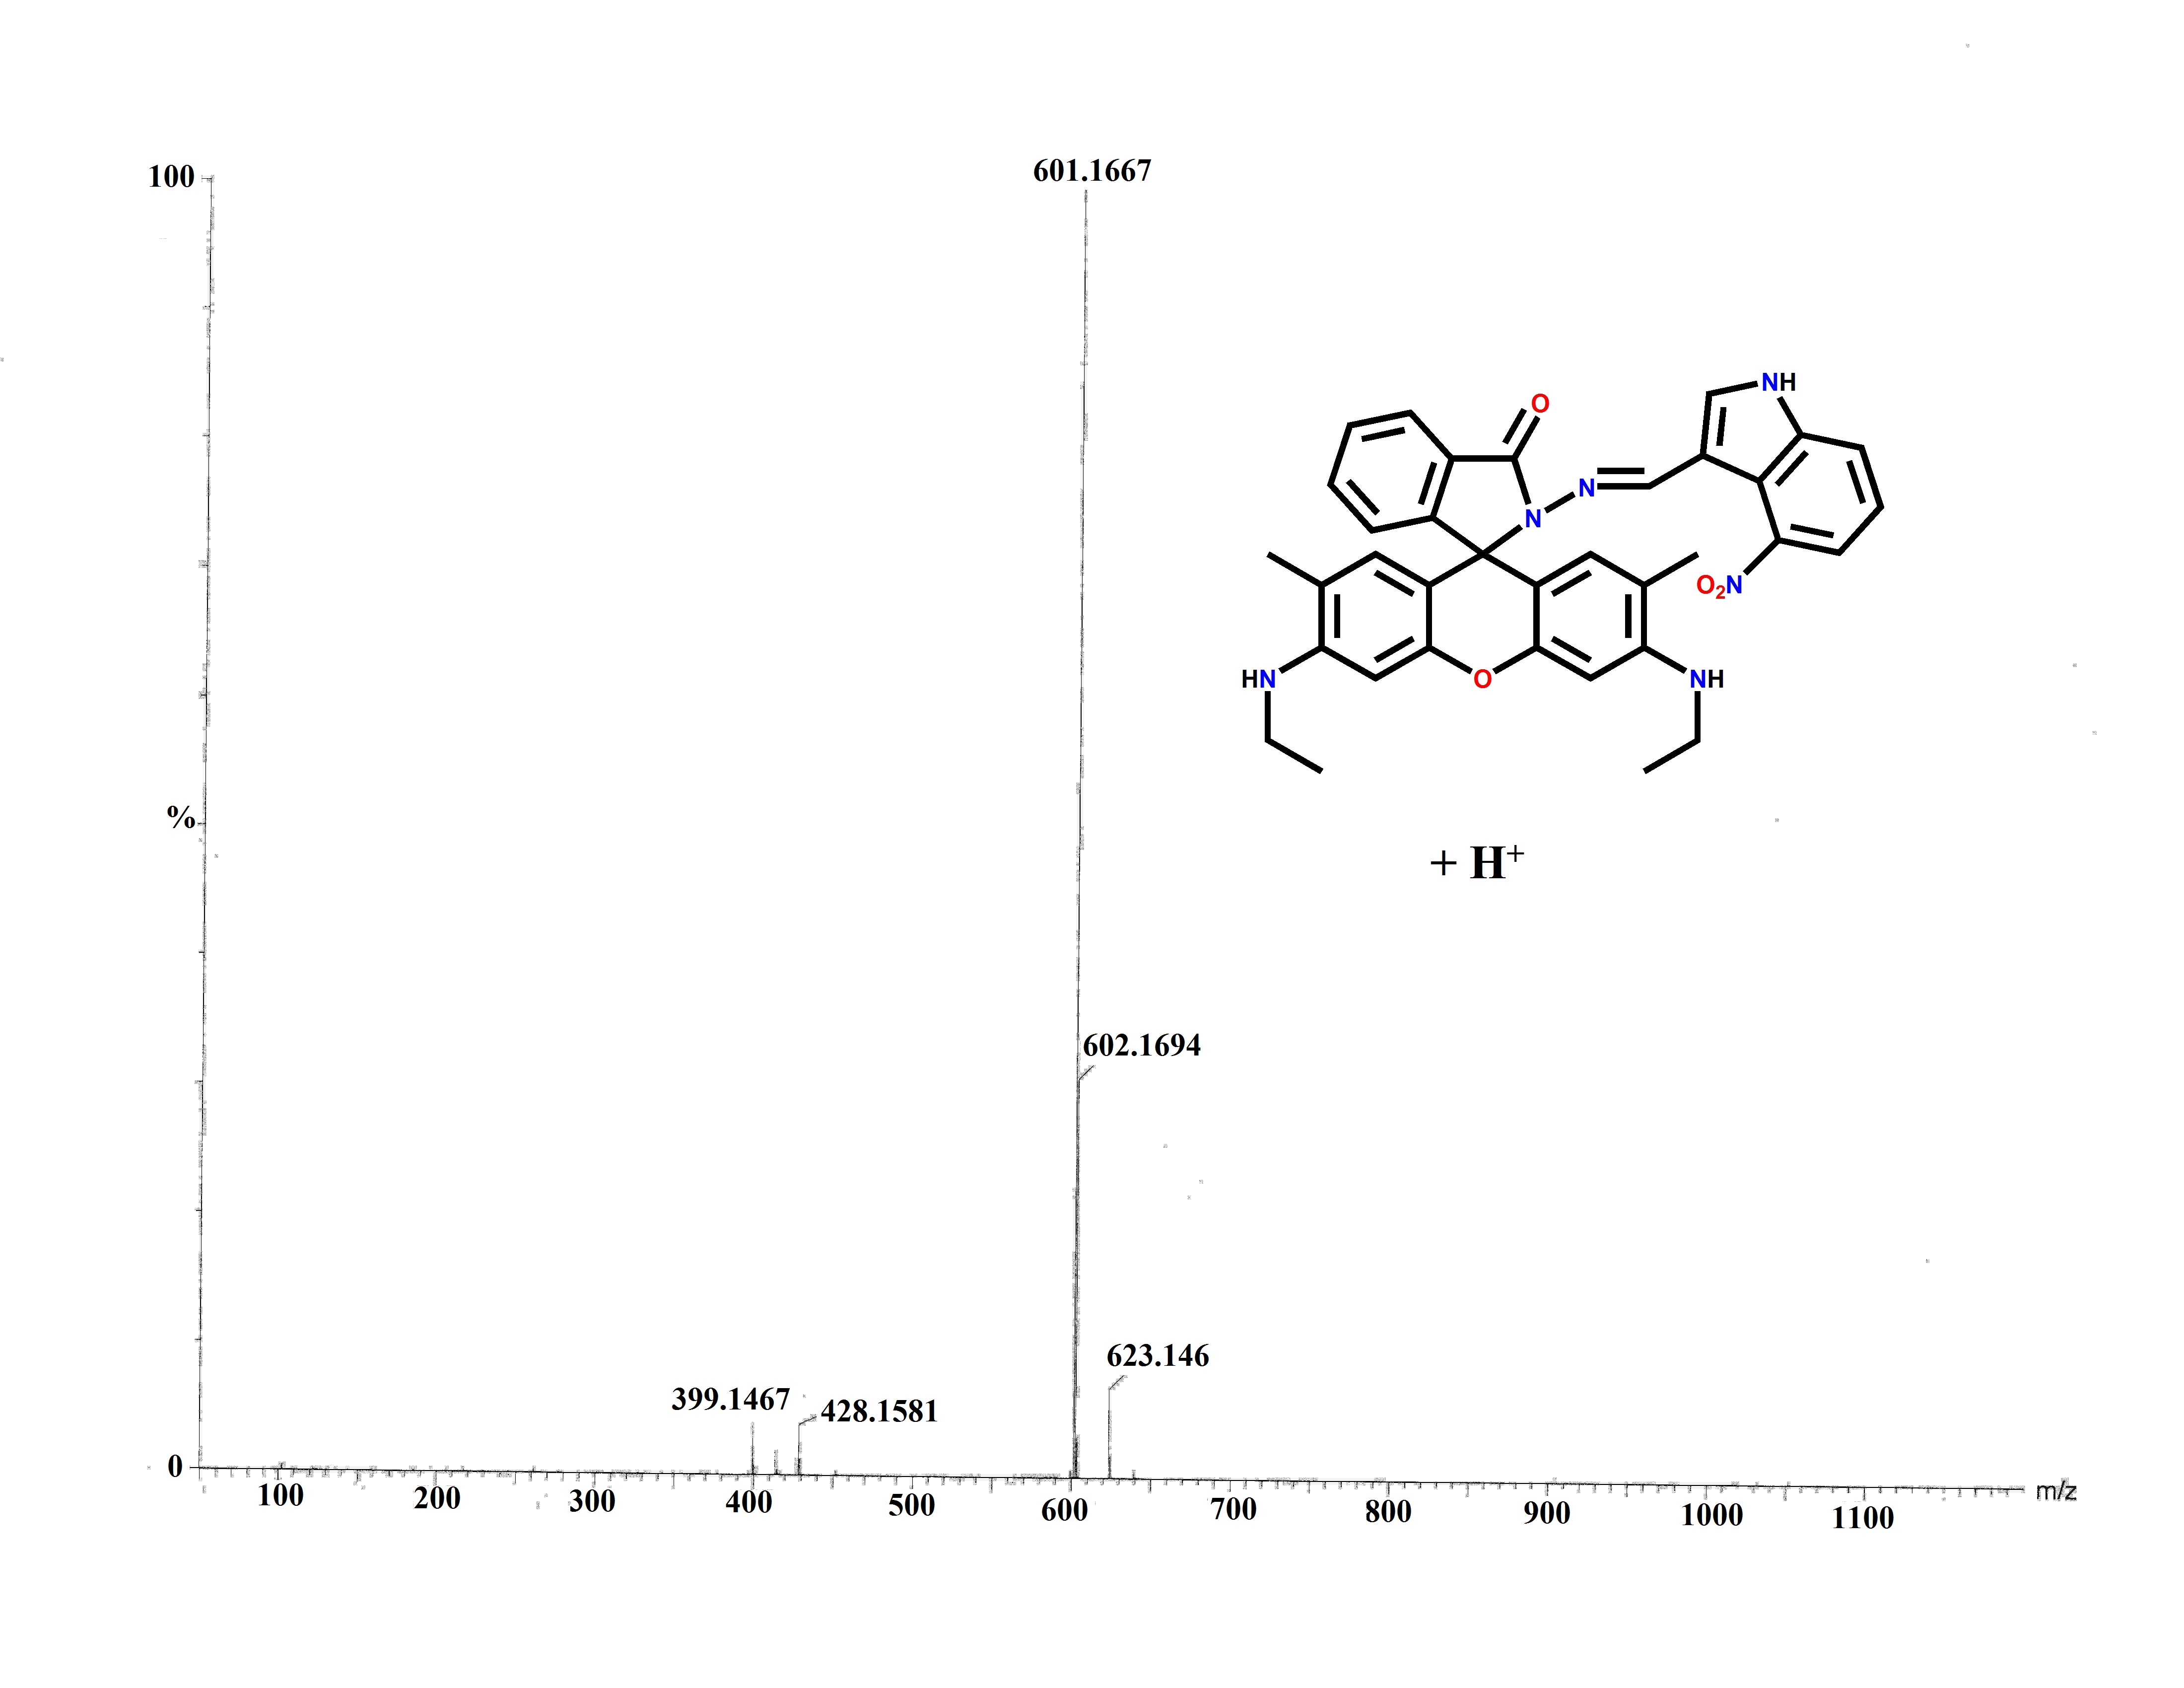


Figure S2. HRMS spectra of **L2** in MeCN.


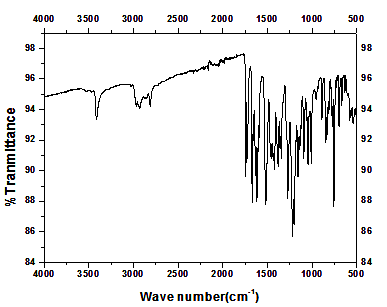


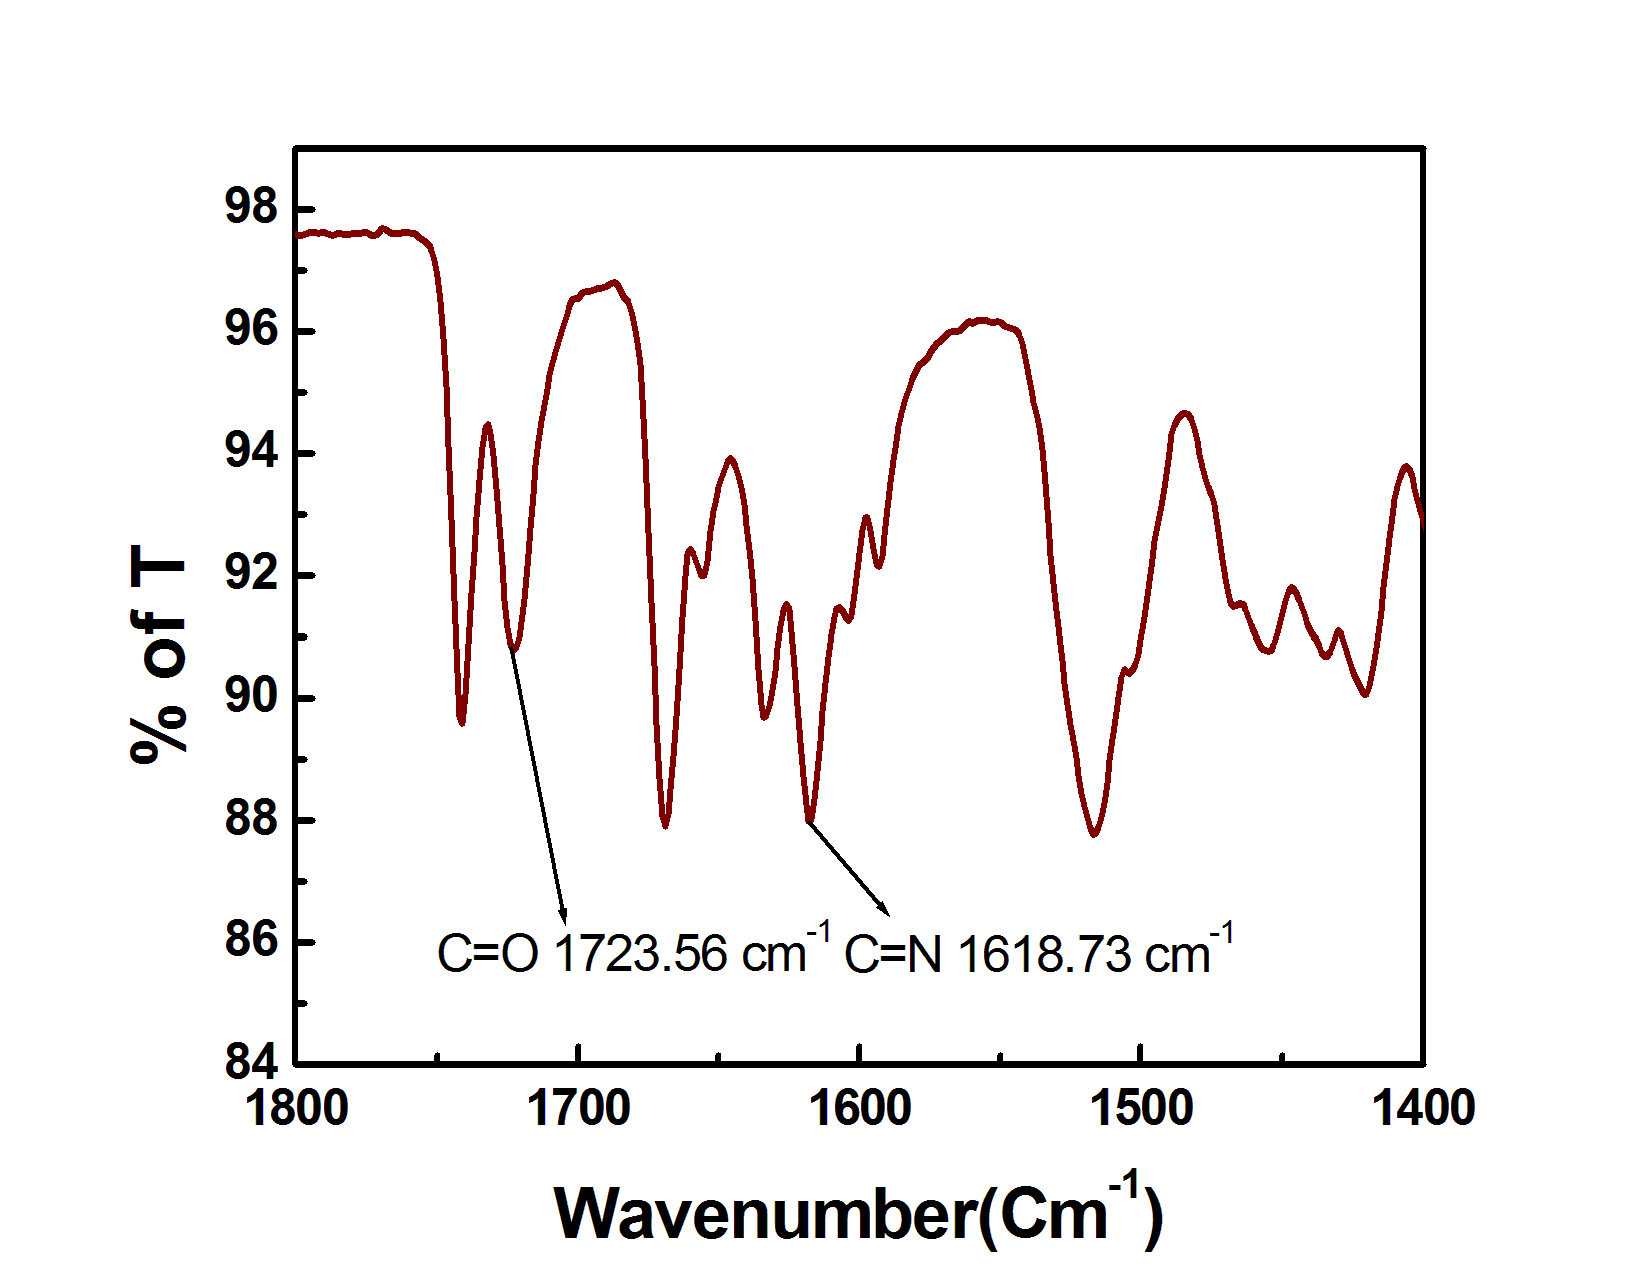


Figure S3. FT-IR spectra of **L2** recorded from KBr pellets on a Nicolet Magna IR 750 series-II FTIR spectrophotometer.


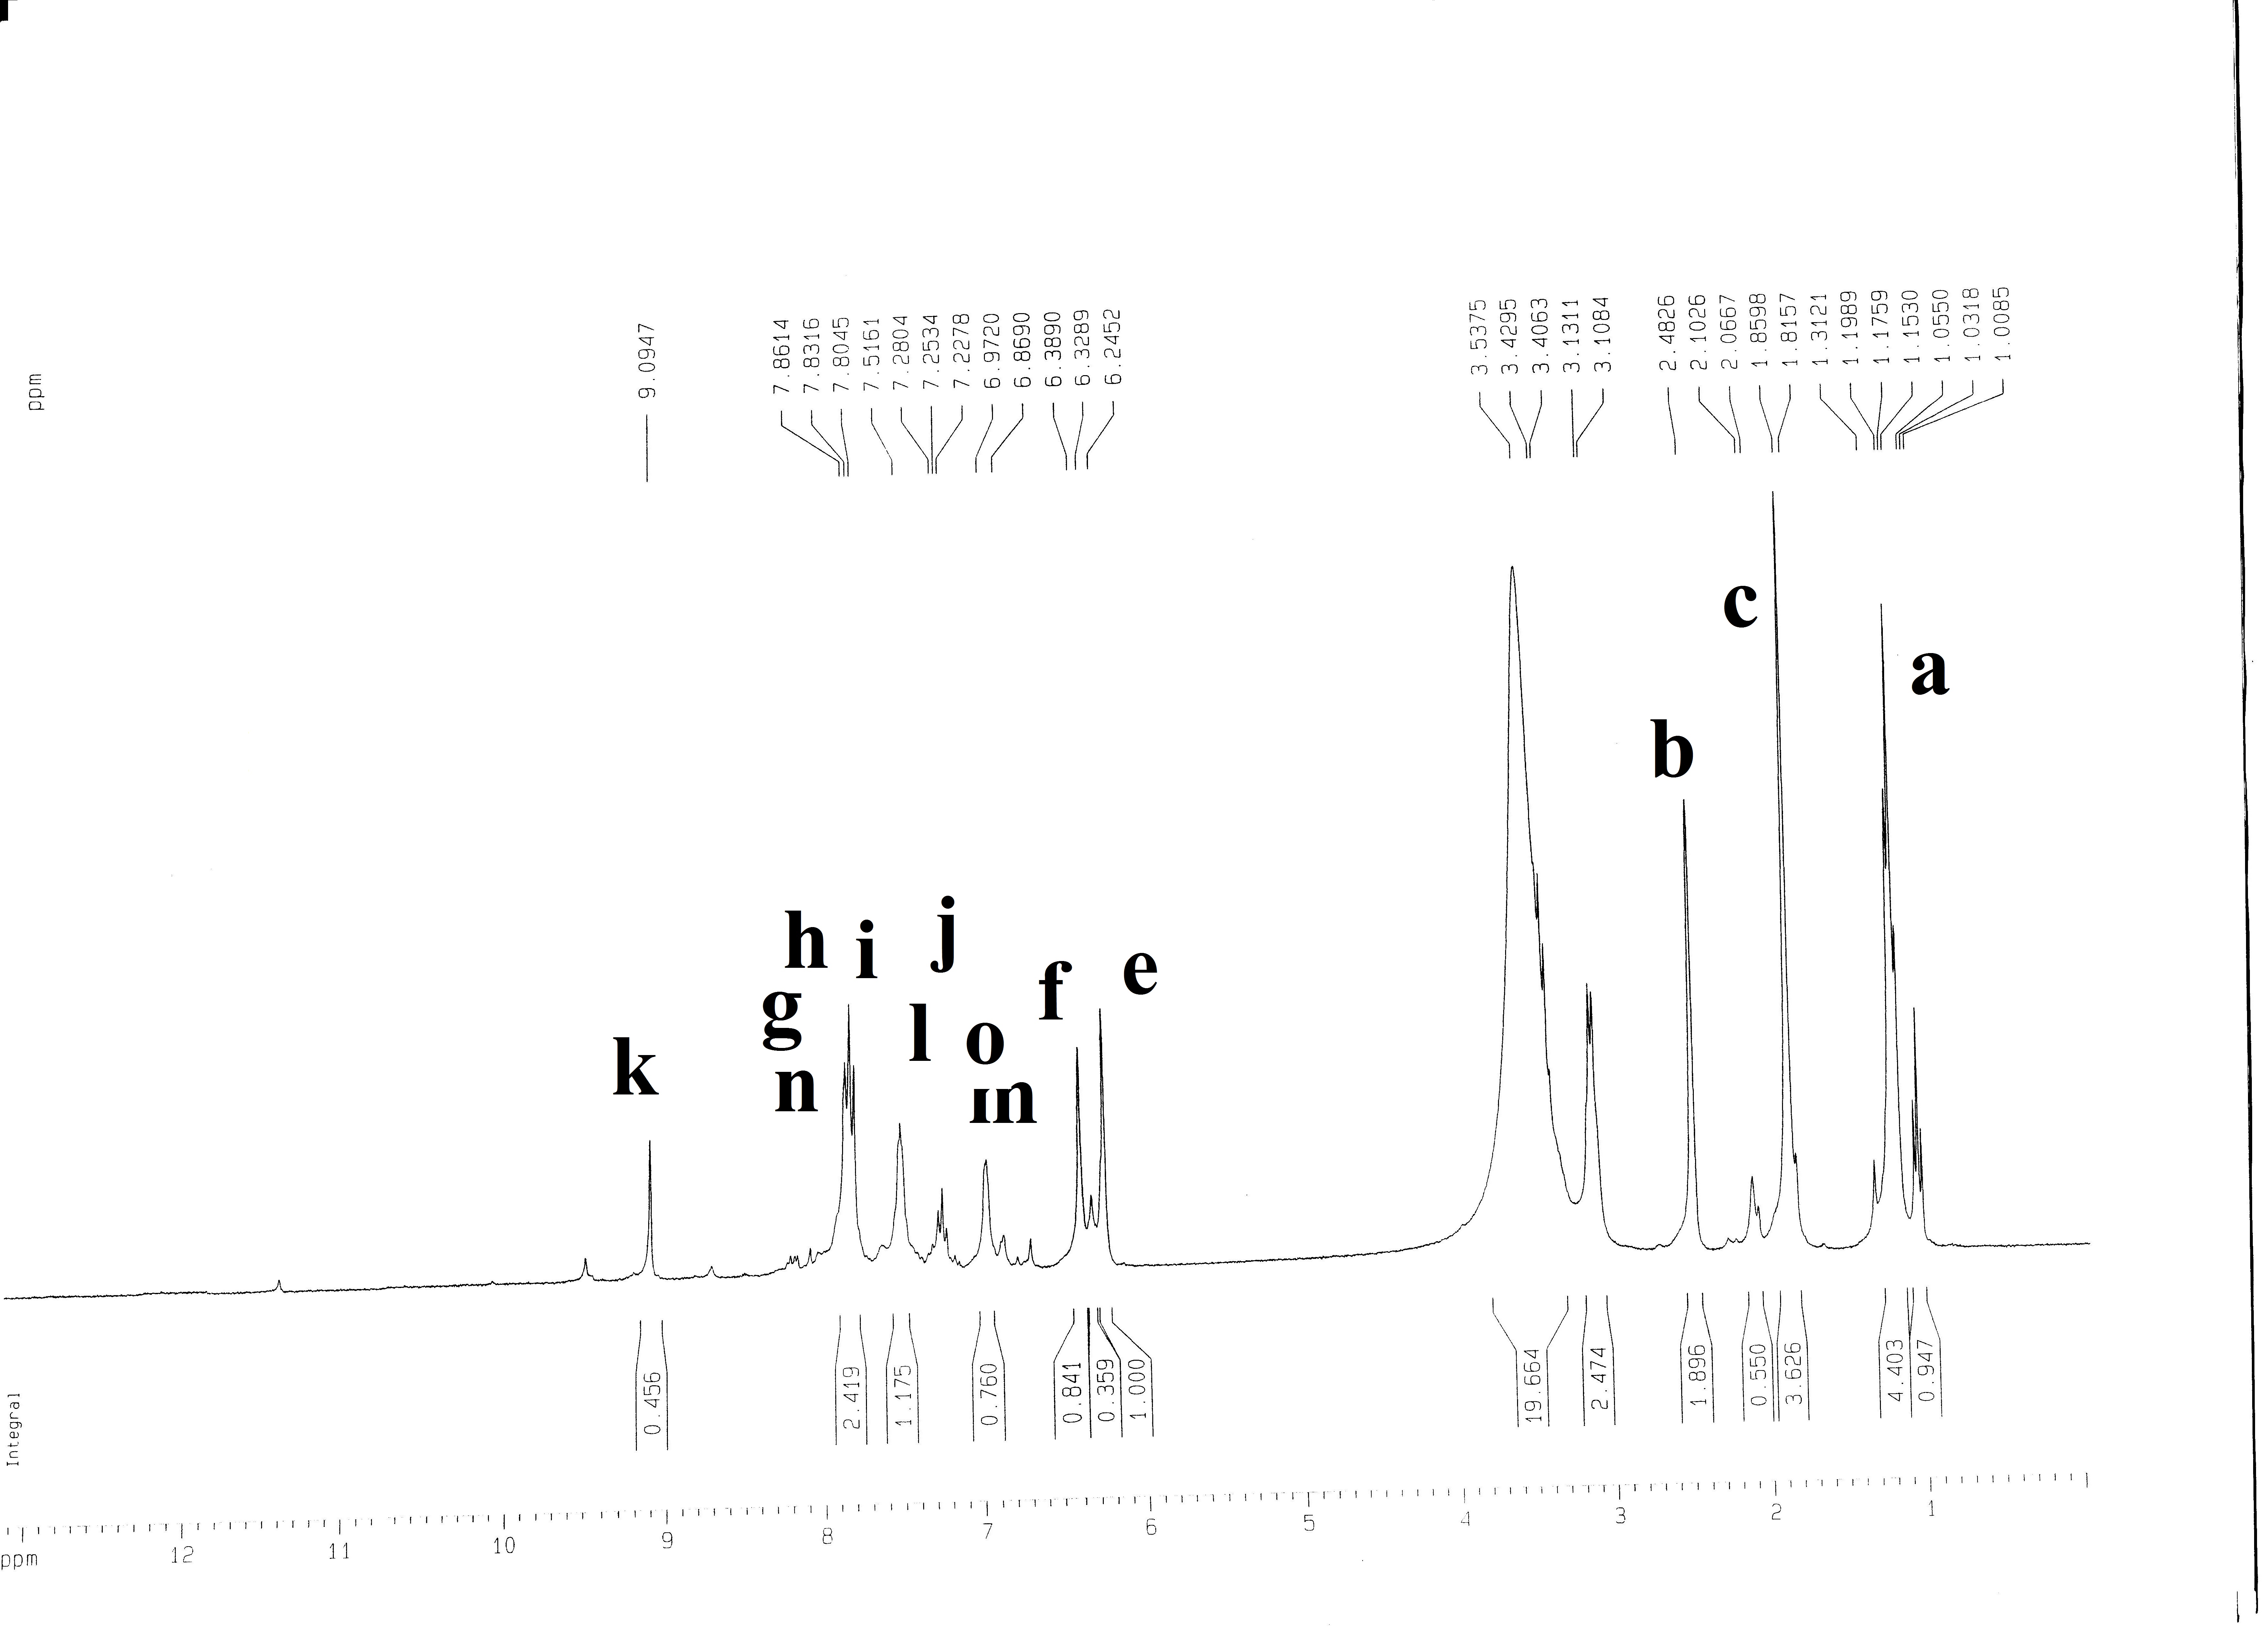


Figure S4. 1H NMR spectra of complex in DMSO-*d*6, in Bruker 300 MHz instrument.


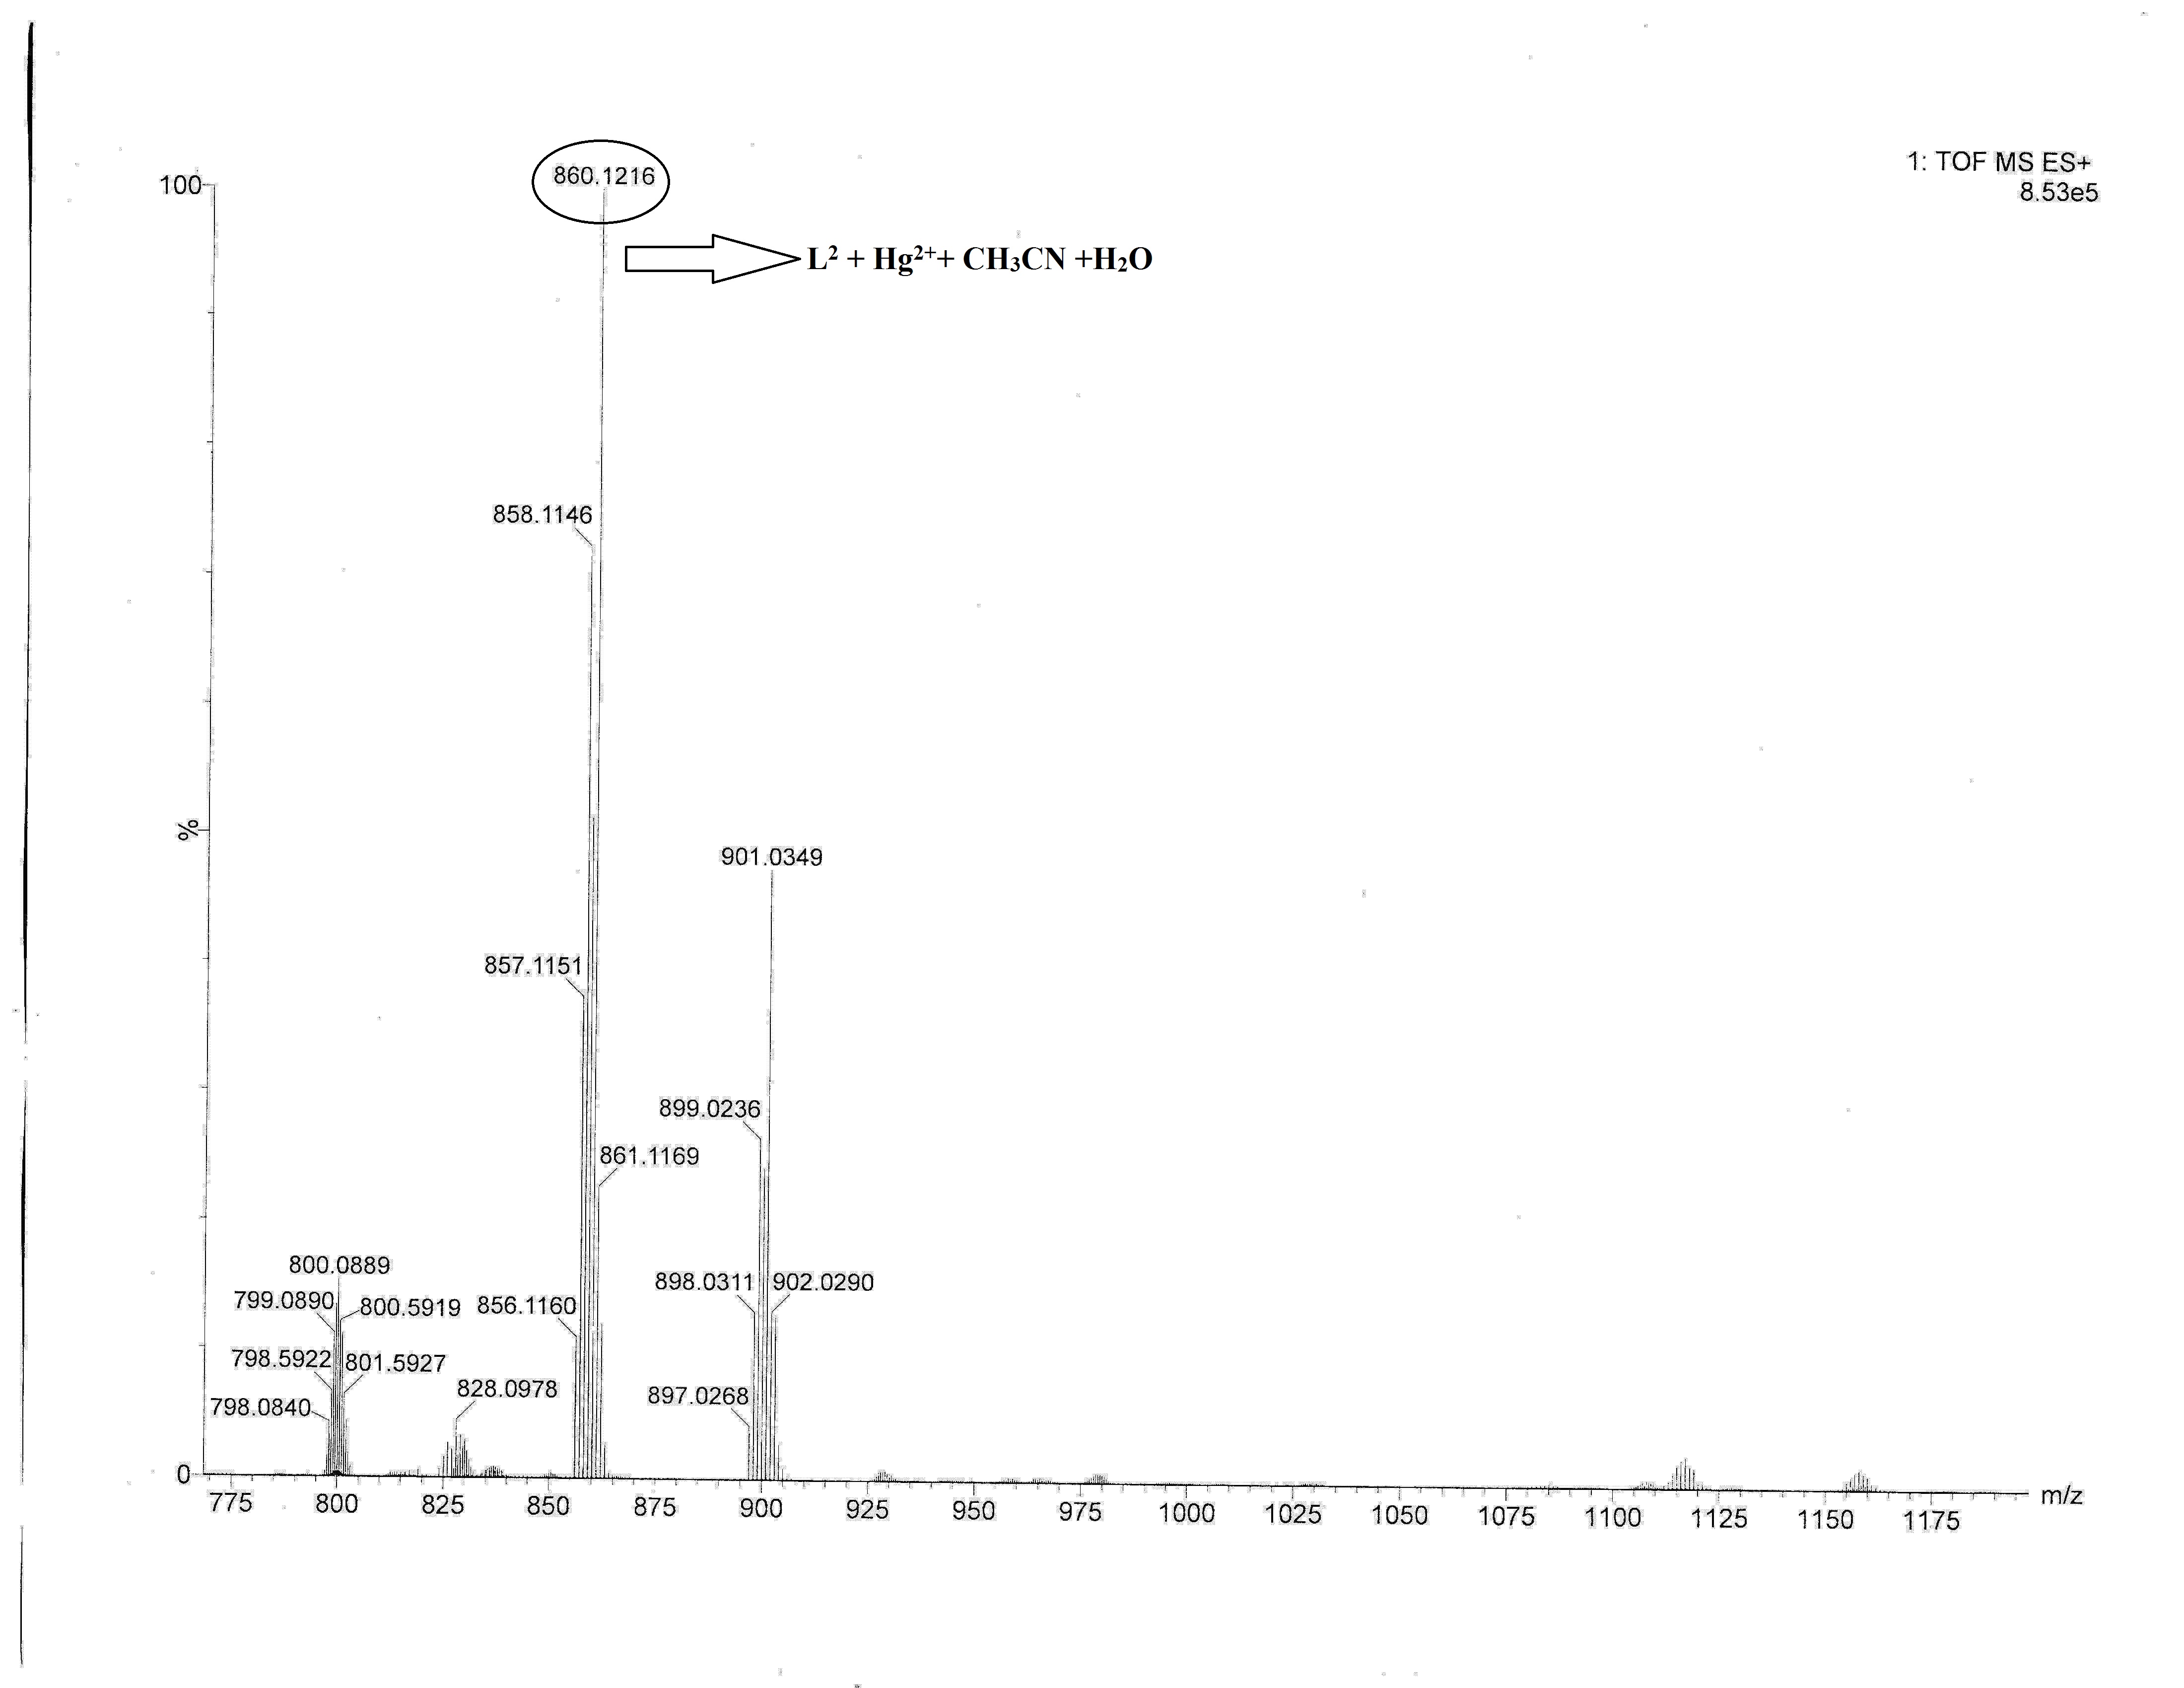


Figure S5. HRMS spectra of **L2**–Hg2+ in MeCN, in G2QTof HRMS instrument.


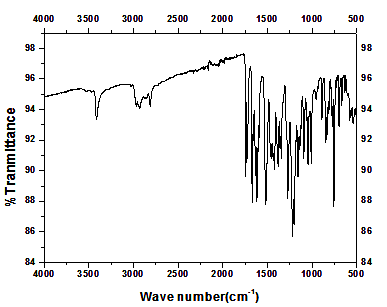


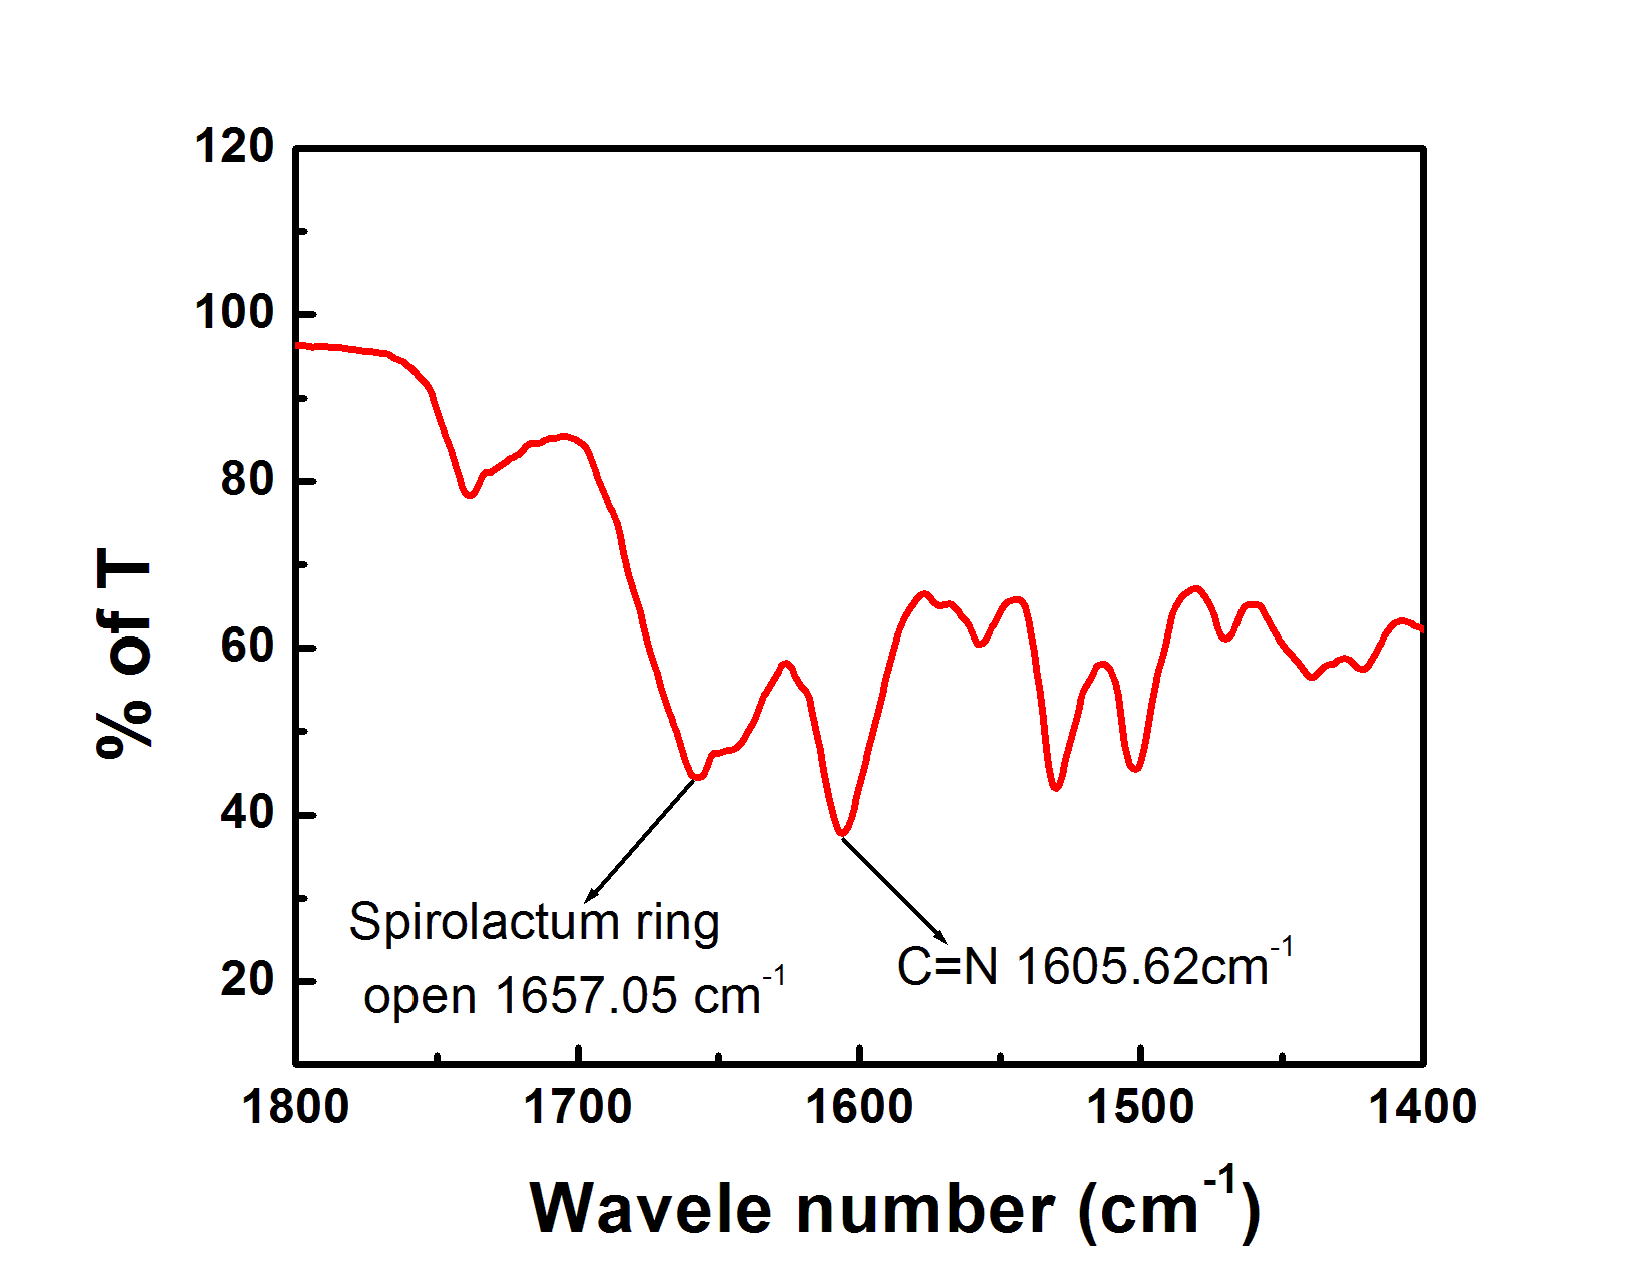


Figure S6. FT-IR spectrum of [**L2**-Hg]2+ complex recorded from KBr pellets on a Nicolet Magna IR 750 series-II FTIR spectrophotometer.


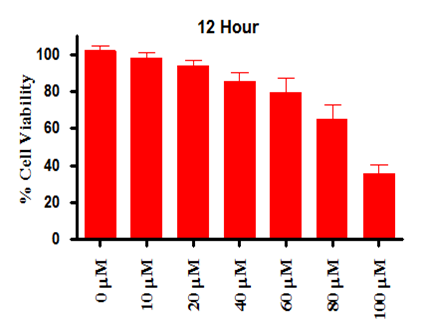


Figure S7. Cytotoxicity assay of **L2**.


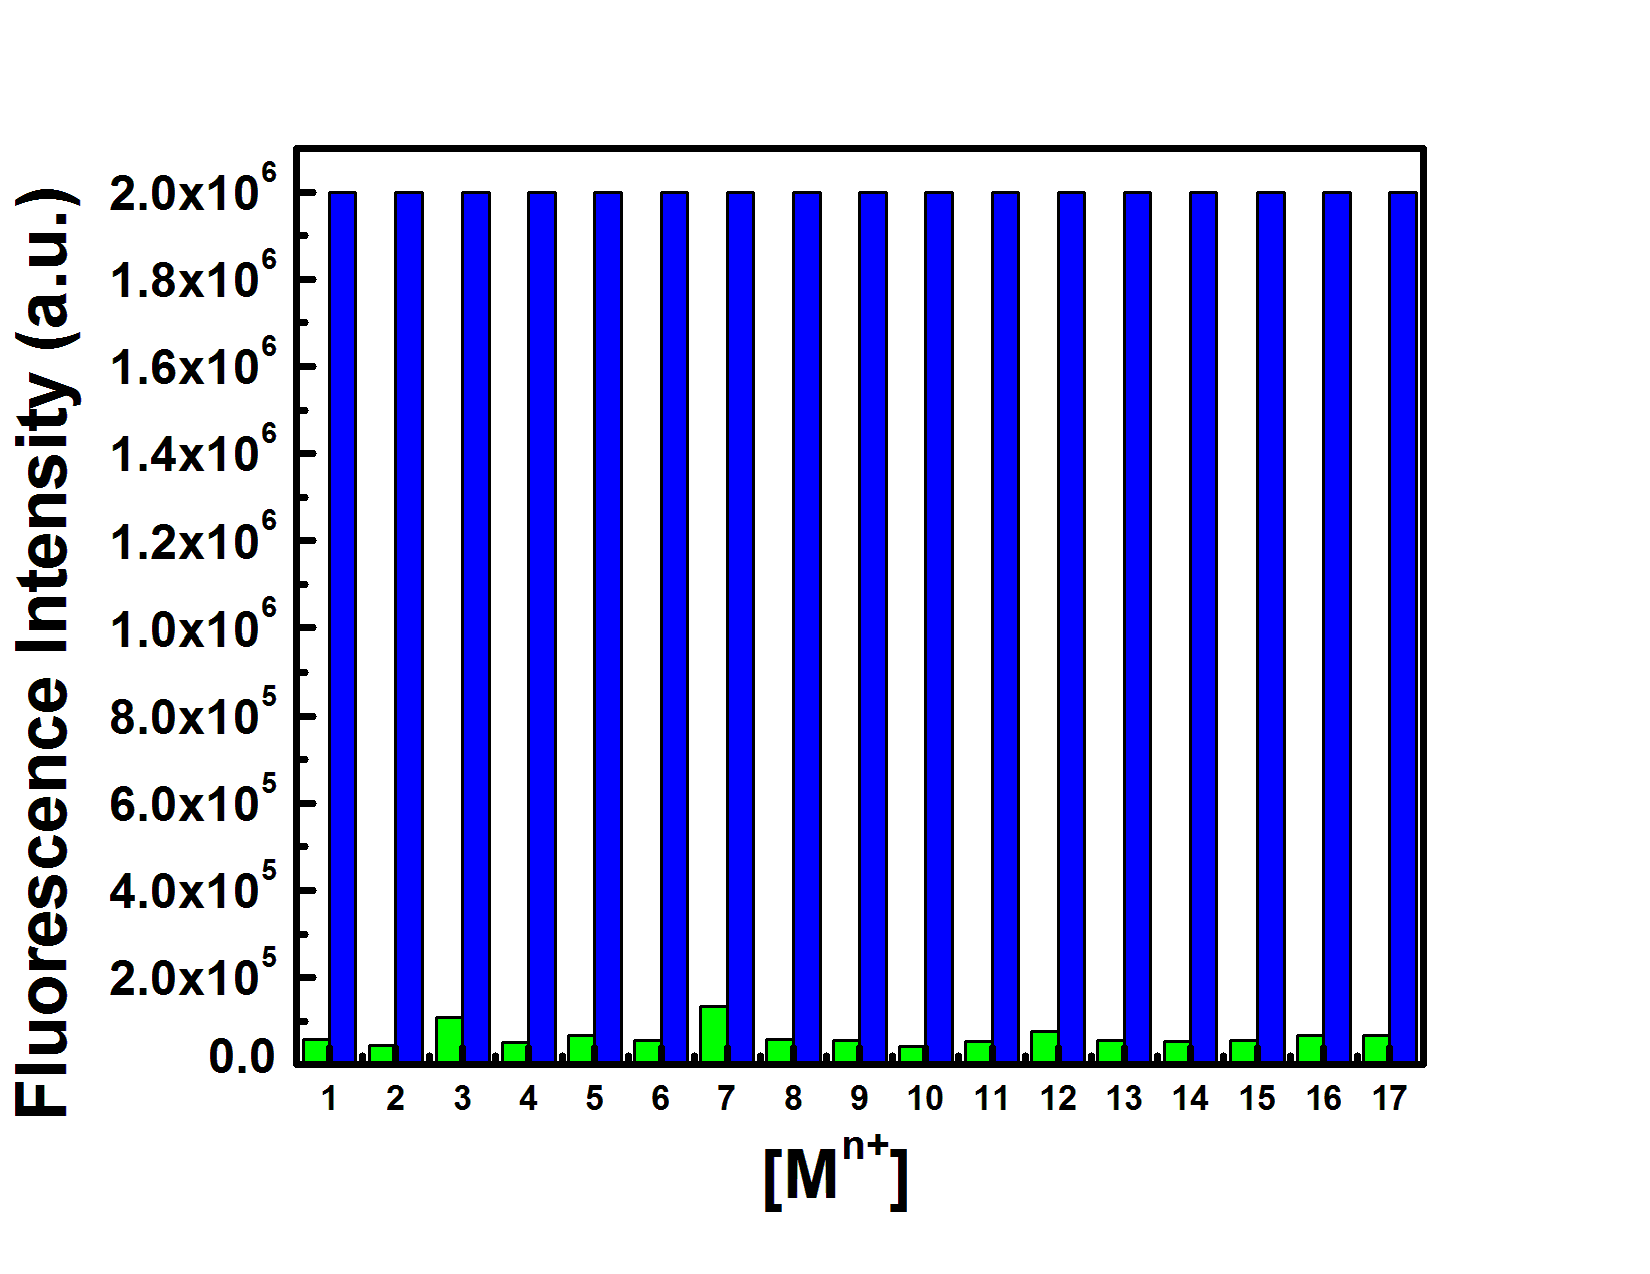


Figure S8. Fluorescence response of **L2** (30 µM) induced by different cations (100 µM) (1-17 are: L2, Hg2+, Na+, Cr3+, Ca2+, Mg2+, K+, Al3+, Mn2+, Fe2+, Co2+, Cu2+, Ni2+, Zn2+, Cd2+, Fe3+, Pb2+, Ag+; and the interference in presence of Hg2+ (blue)).


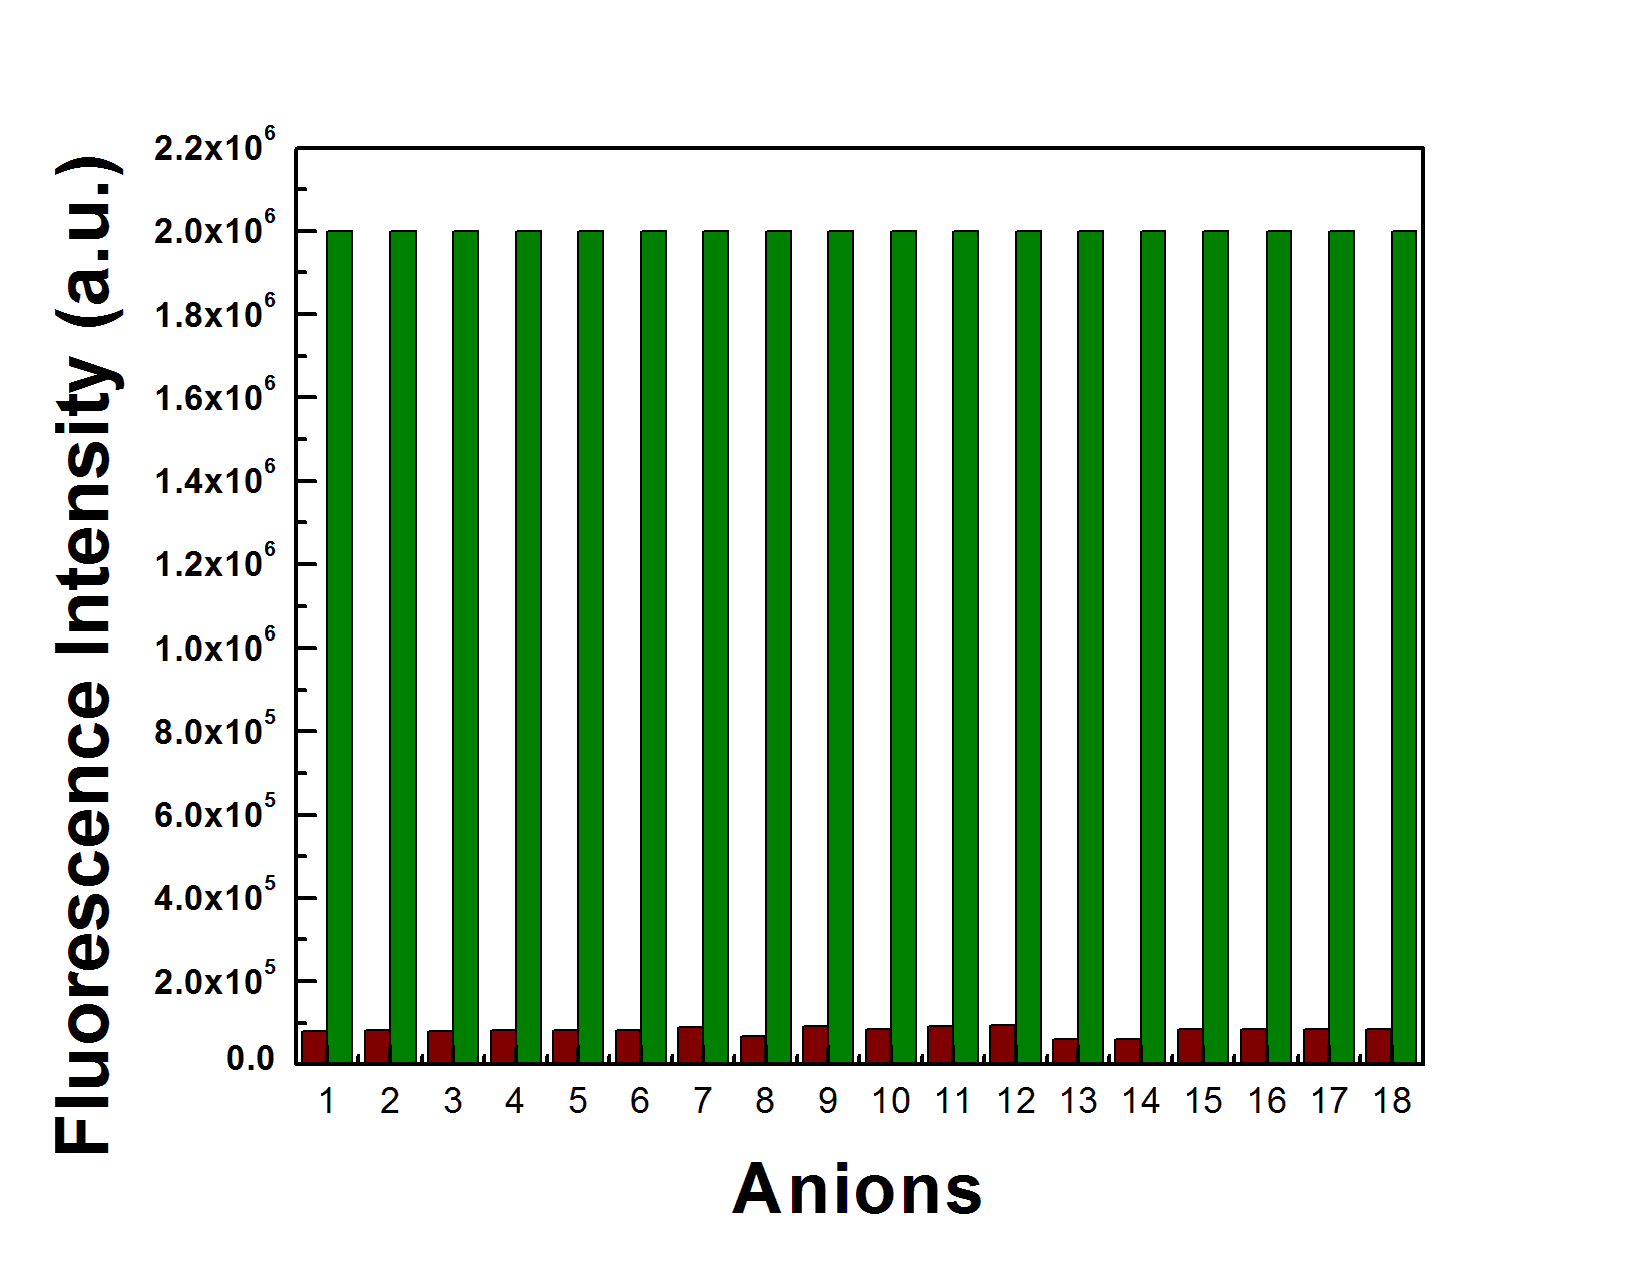


Figure S9. Fluorescence response of **L2** (30 µM) induced by different anions (100 µM) (1-17 are: L2, Hg2+, CN-, SO42–, NO3–, PO43–, S2–, Cl–, F–, Br–, OAc–, H2AsO4-, N3–, ClO4-, S2O42-, CO32-, P2O74‑, NO2- and HCO3- and the interference in presence of Hg2+ (green)).

**
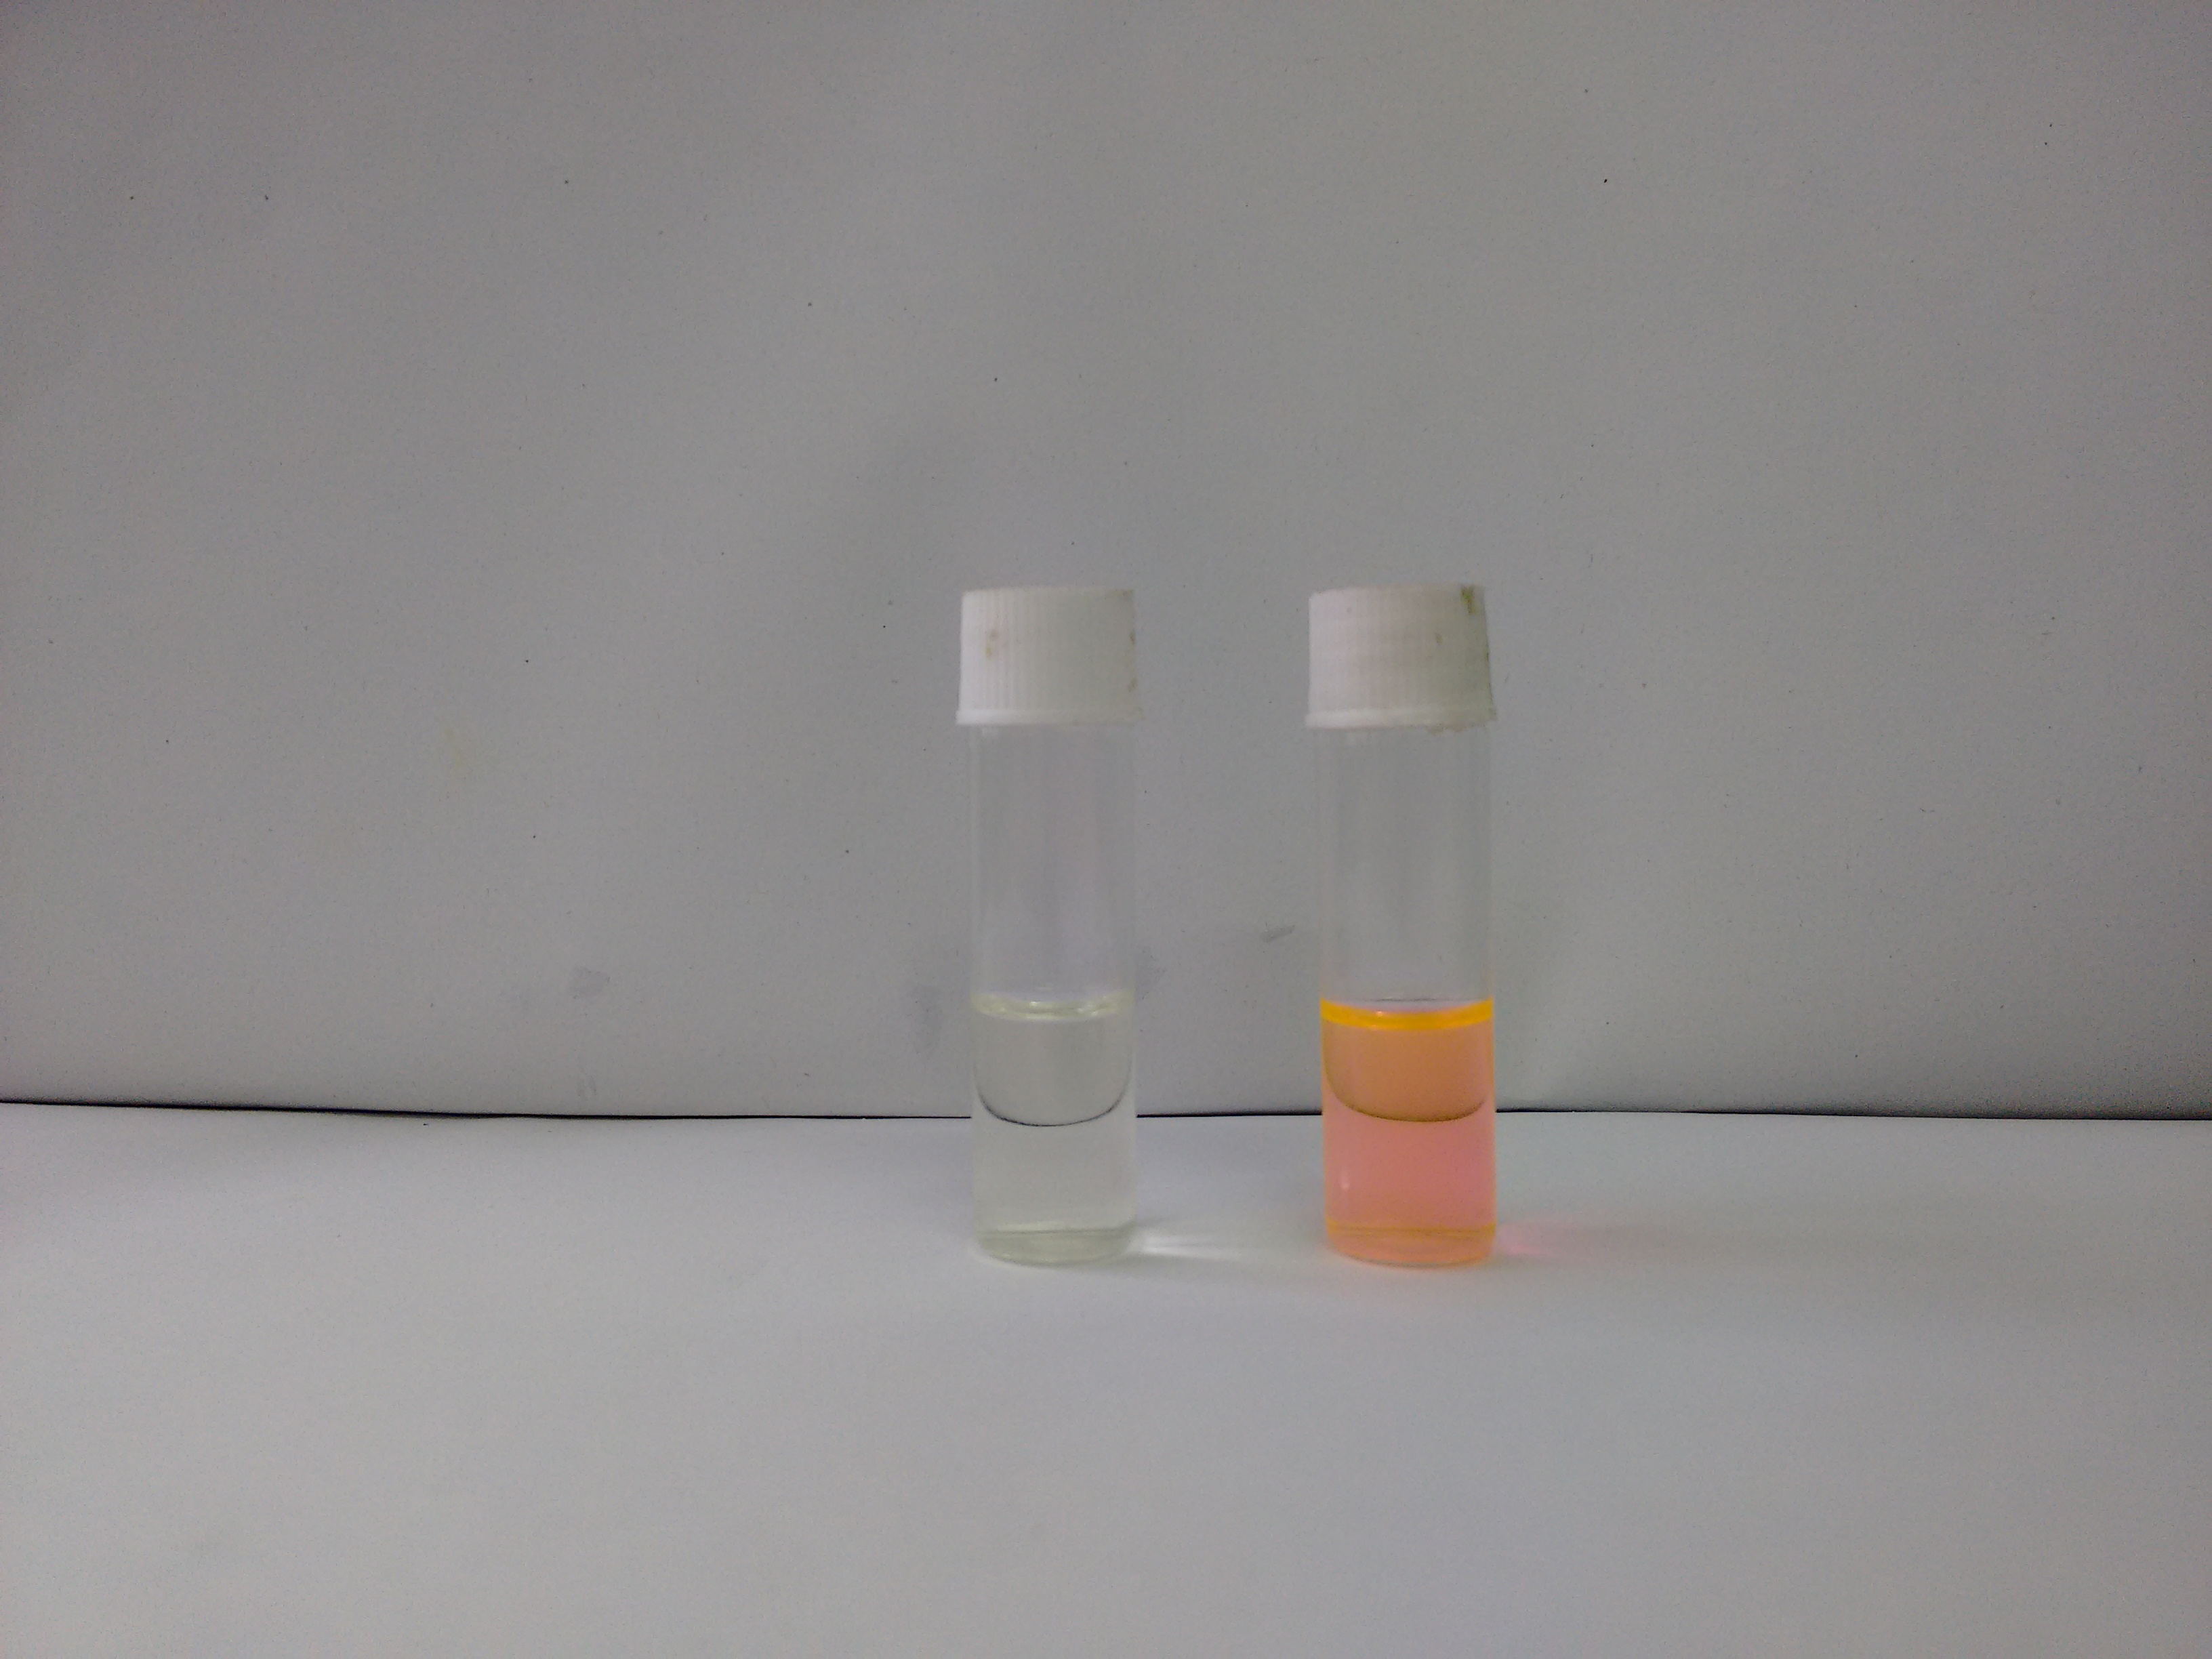

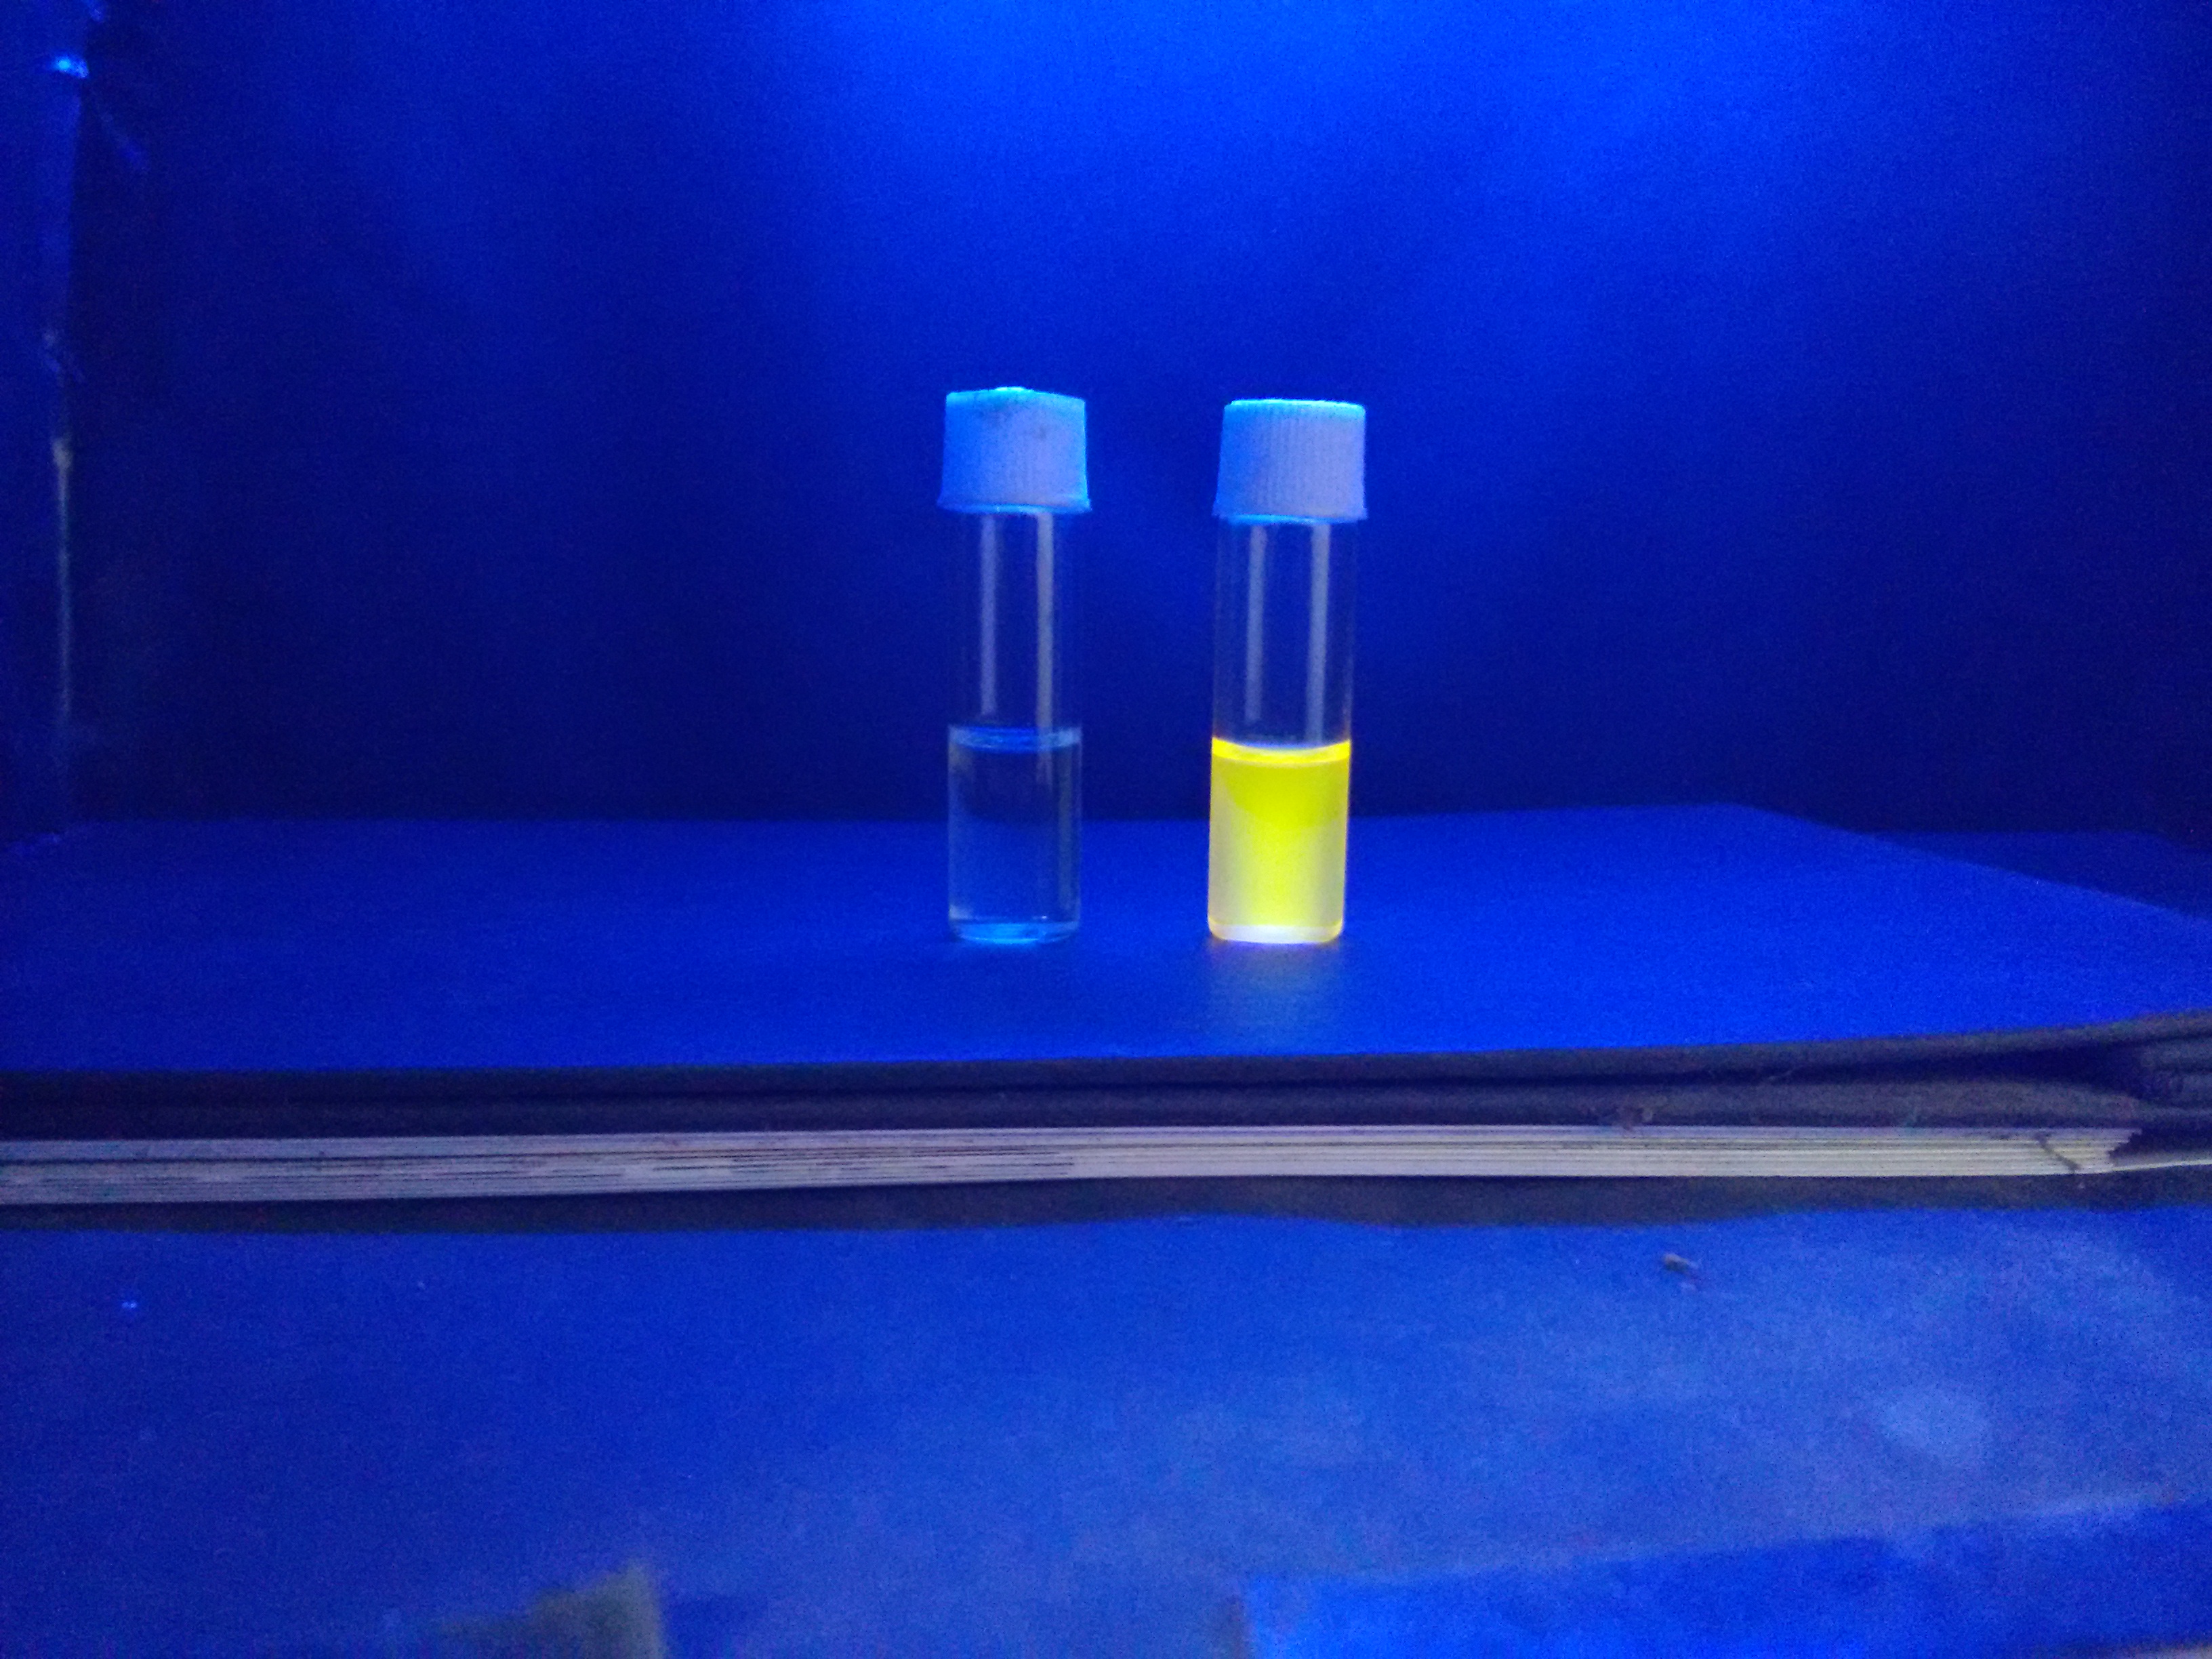
**

**Naked eye vision UV exposed light vision**

Figure S10. Naked eye (**L2** colorless and **L2**-Hg2+ red) and UV light exposed image (**L2** colorless and **L2**-Hg2+ yellow).


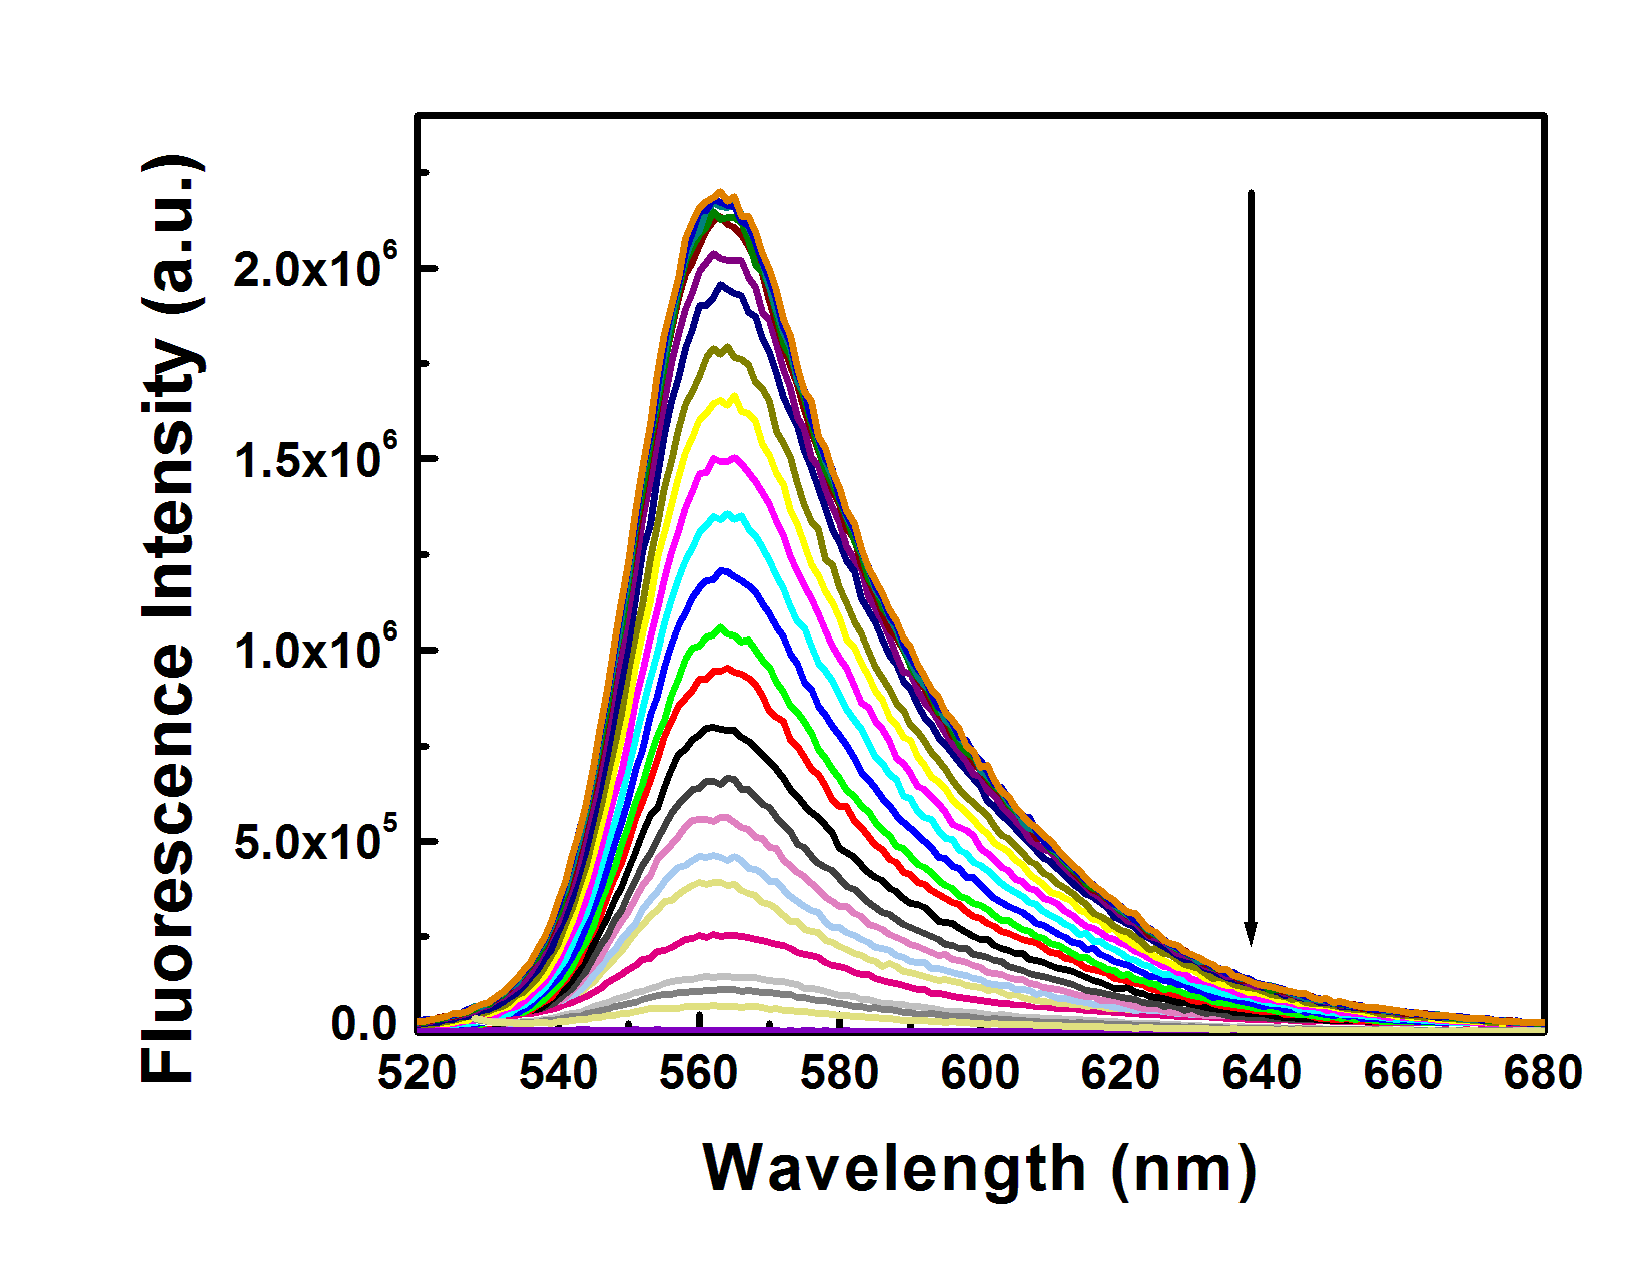

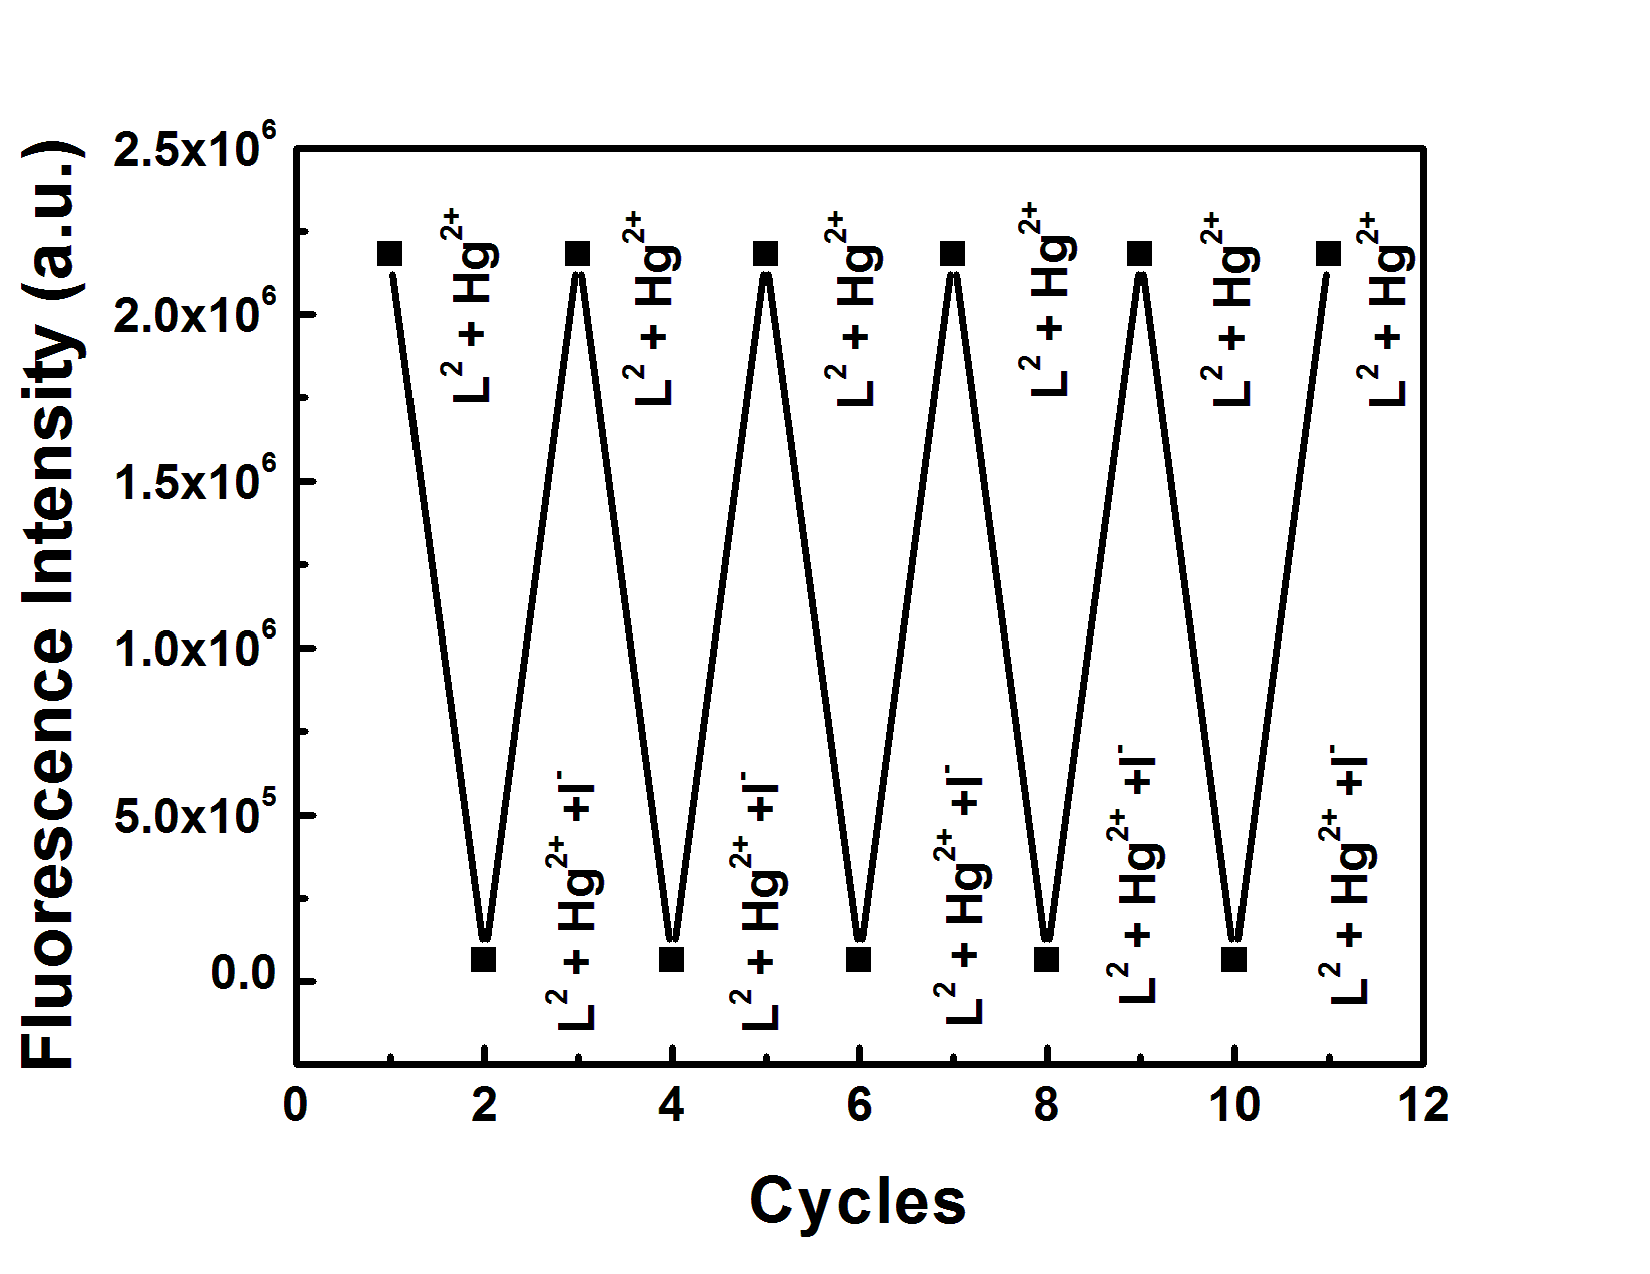


(a) (b)

Figure S11. (a) Fluorescence quenching emission spectra of **L2**-Hg2+ (30 μM) in MeCN/H2O (1:1, v/v, pH 7.2, 10 mM HEPES buffer) solutions with gradually addition of I‒ (70 µM); (b) Cascade fluorescence ON-OFF-ON response of **L2** with sequential addition of Hg2+ and I‒.

**Calculation for LOD value:**

To determine the detection limit, fluorescence titration of **L2** with Hg2+ was carried out by adding aliquots of micro-molar concentration of Hg2+. However, the detection limit (LOD) of **L2**-Hg2+ is calculated by 3σ method,

**
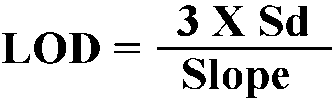
**

where Sd is the standard deviation of the blank and slope is from the plot of emission intensities versus Hg2+.


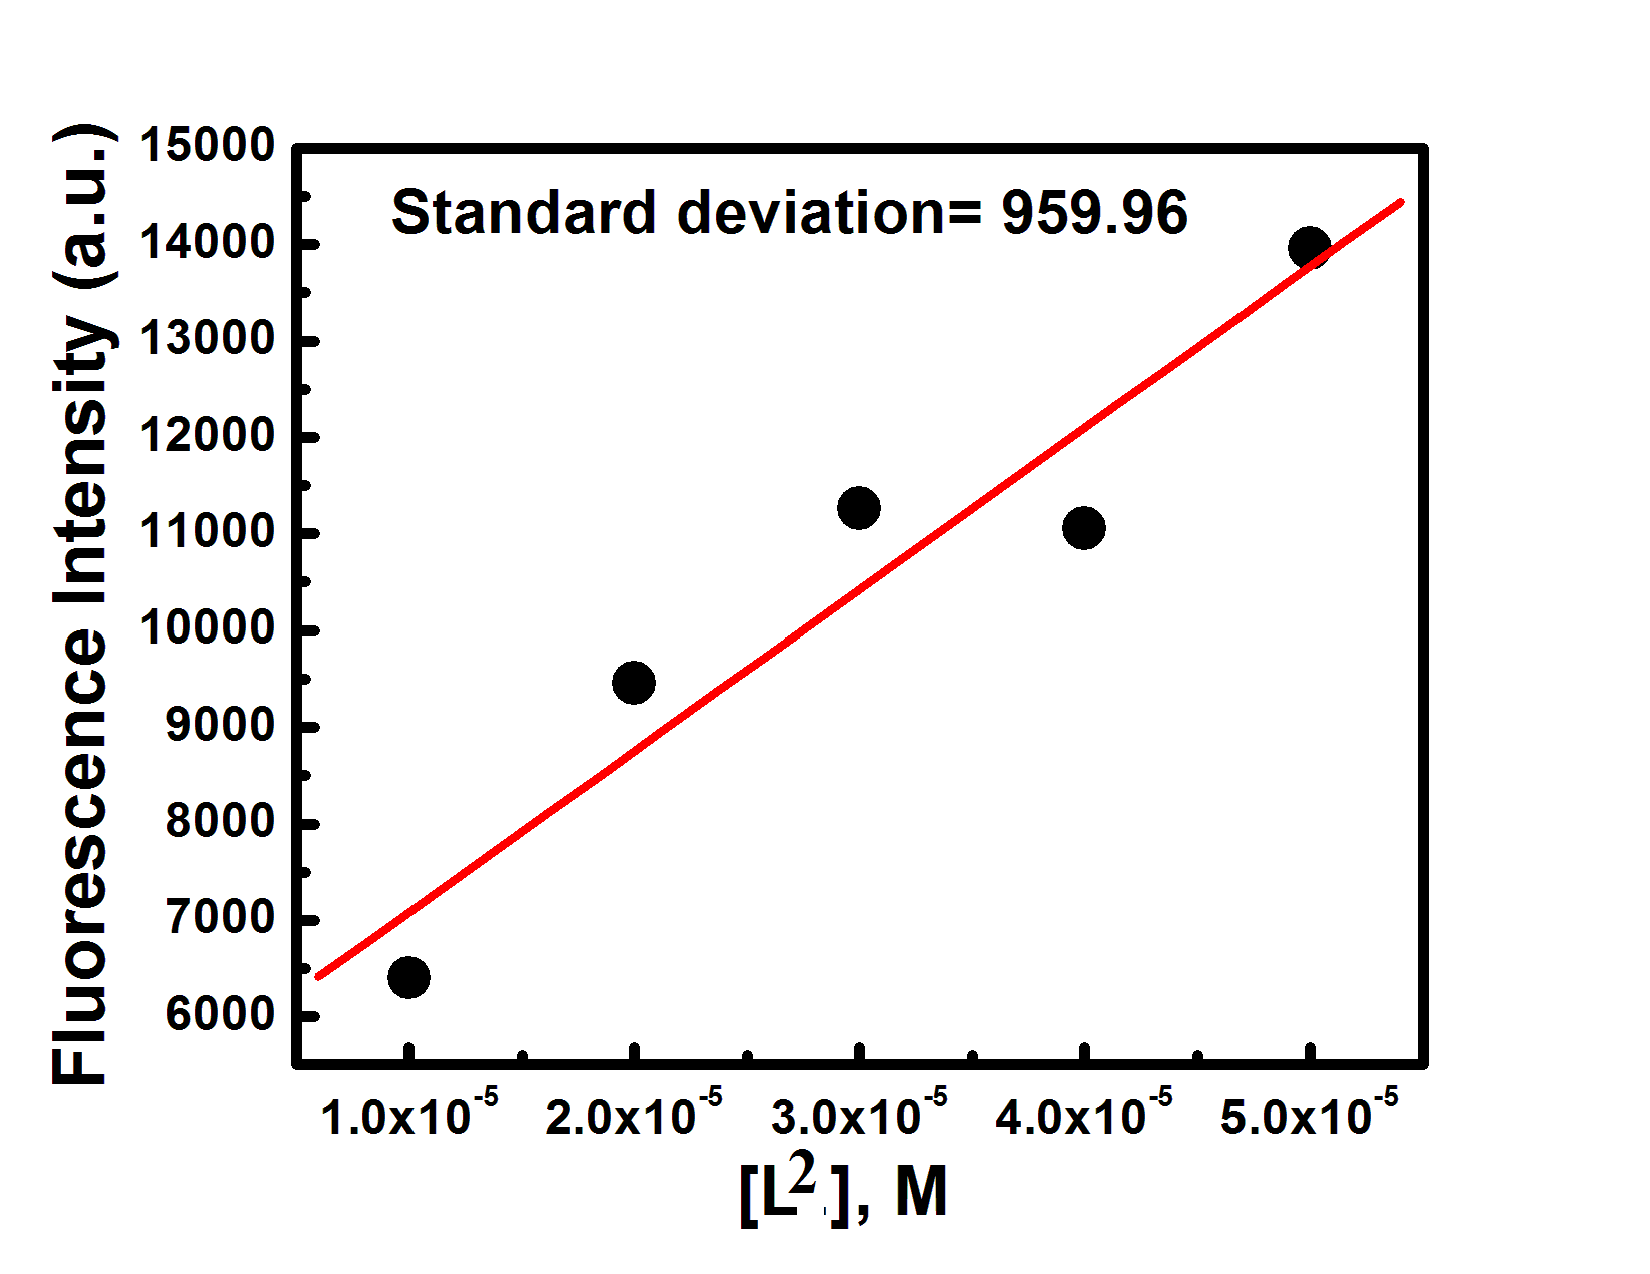

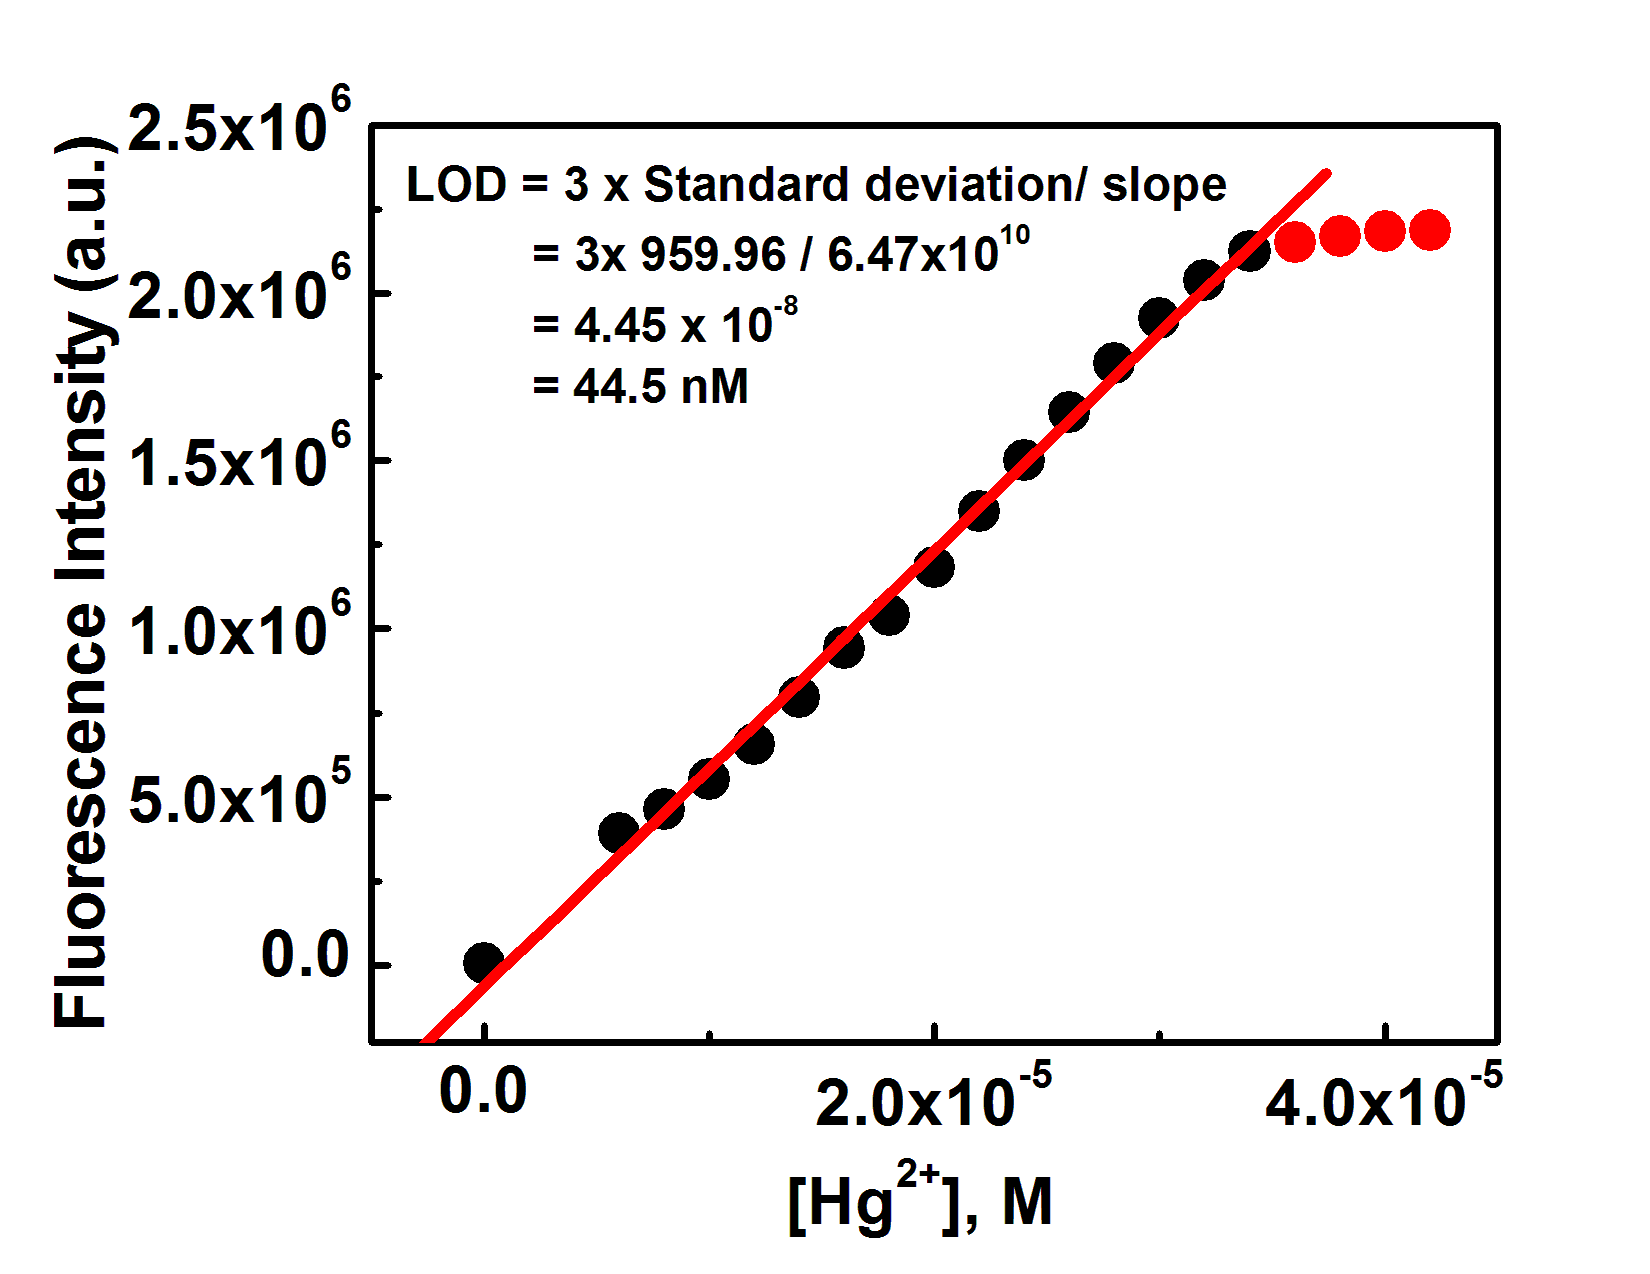


Figure S12. LOD determination by 3 method with ex = 510 nm, em = 562 nm.

**Quantum yield determination**:

Fluorescence quantum yields (**Φ**) were estimated by integrating the area under the fluorescence

curves with the equation:

**Φ** *sample* = ×× **Φ***std*

where A was the area under the fluorescence spectral curve, OD was optical density of the compound at the excitation wavelength and η was the refractive indices of the solvent. Rhodamine‑6G was used as quantum yield standard (quantum yield is 0.94 in ethanol) for measuring the quantum yields of **L2** and **L2**-Hg2+.

Table S1. Details of crystallographic data collection and refinements.

| Parameters | **1** (CCDC 1844046) |
| --- | --- |
| Elemental formula | C35 H32 N6 O4,C3 H7 N O |
| Formula weight | 673.76 |
| Crystal system | Triclinic |
| Space group | P-1 |
| Temp/K | 293 |
| a/Å | 11.66(3) |
| b/Å | 11.94(3) |
| c/Å | 13.44(3) |
| V/A3 | 1691(6) |
| Z | 2 |
| Density (D/gcm-3) | 1.323 |
| μ/mm-1 | 0.090 |
| F(000) | 712 |
| Θ range for data collection/0 | 1.8, 26.8 |
| Dataset | -14: 14 ; -15: 15 ; -17: 17 |
| Tot., Uniq. Data, R(int) | 11393, 7214, 0.075 |
| Observed data [I > 2.0 σ(I)] | 2389 |
| Nref, Npar | 7214, 465 |
| R, wR2, S | 0.0549, 0.2436, 1.00 |

Table S2. Some selected bond distances and angles.

| **Bond lengths (Å)** | |
| --- | --- |
| **C27-N4** | 1.269 |
| **C28-C27** | 1.455 |
| **N4-N3** | 1.379 |
| **N6-O3** | 1.226 |
| **N6-O4** | 1.214 |
| **N3-C10** | 1.505 |
| **N5-C29** | 1.338 |
| **O2-C26** | 1.219 |
| **Bond angles ()** | |
| **C28-C27-N4** | 118.2 |
| **C27-N4-N3** | 120.5 |
| **N3-C10-C11** | 112.5 |
| **O2-C26-C25** | 127.9 |
| **O2-C26-N3** | 126.3 |
| **O4-N6-C34** | 119.3 |
| **O3-N6-C34** | 118.5 |

Table S3. Selected optimized geometrical parameters for complex in the ground state calculated at B3LYP Levels.

| Bond lengths (Å) | | | |
| --- | --- | --- | --- |
| Hg76-N2 | 2.33 |  |  |
| Hg76-O5 | 2.26 |  |  |
| Hg76-O77 | 2.36 |  |  |
| Hg76-N79 | 2.33 |  |  |
| Bond angles (o) | | | |
| N79-Hg76-O5 | 119.43 | N7-N2-C8 | 118.13 |
| O5-Hg76-N2 | 71.97 | O3-N32-O4 | 121.83 |
| N2- Hg76-O77 | 90.03 |  |  |

Table S4. Change in bond lengths for complex compared to free **L2** in the ground state calculated at B3LYP levels.

| Bond lengths (Å) | | |
| --- | --- | --- |
|  | Free ligand (**L2**) | Complex |
| N7-N2 | 1.36 | 1.39 |
| N2-C8 | 1.29 | 1.30 |

______________________________________________________

**Table S5. Selected parameters for the vertical excitation (UV-vis absorptions) of L2; electronic excitation energies (eV) and oscillator strengths (*f*), configurations of the low-lying excited states of L; calculation of the S0-Sn energy gaps based on optimized ground-state geometries (UV-vis absorption) (CH3CN used as solvent).**

| Electronic  transition | Composition | Excitation  energy | Oscillator strength  (*f*) | CI | λexp  (nm) |  |
| --- | --- | --- | --- | --- | --- | --- |
| S0 → S3 | HOMO–2 → LUMO | 2.2519eV  (550 nm) | 0.0501 | 0.70363 | 531 |  |
| S0 → S10  S0 → S11 | HOMO–9→ LUMO  HOMO-2→ LUMO + 1  HOMO-9→ LUMO  HOMO–8→ LUMO  HOMO-7→ LUMO  HOMO-6→ LUMO  HOMO-2→ LUMO+1 | 3.6166 eV  (342 nm)  3.7067eV  (334 nm) | 0.2818  0.3304 | 0.16756 0.59339  0.24590  0.11834  0.25464  0.45487  0.36055 | 342  334 |  |

Table S6. Main calculated optical transition for the complex with composition in terms of molecular orbital contribution of the transition, vertical excitation energies, and oscillator strength in acetonitrile.

| Electronic  transition | Composition | Excitation  energy | Oscillator strength  (*f*) | CI | λexp  (nm) |
| --- | --- | --- | --- | --- | --- |
| S0 → S3 | HOMO – 2 → LUMO | 2.3769 eV  (521 nm) | 0.0500 | 0.67645 | 531 |
| S0 → S10  S0 → S11 | HOMO – 2→ LUMO + 1  HOMO – 5→ LUMO + 1  HOMO – 1 → LUMO + 2  HOMO – 2 → LUMO + 2  HOMO – 4 → LUMO + 1  HOMO – 5 → LUMO + 1 | 3.1518 eV  (393 nm)  3.5778eV  (346 nm) | 0.1175  0.3584 | 0.66385  0.14759  0.63005  0.13415  0.15064  0.12001 | 401  350 |
